# Supplementary material for: Genomic dissection of conserved transcriptional regulation in intestinal epithelial cells
Source: PLoS Biol. 2017 Aug 29;15(8):e2002054. doi: 10.1371/journal.pbio.2002054 (PMC5574553; doi:10.1371/journal.pbio.2002054)
Supplement: S2 Table — (XLSX) [file pbio.2002054.s012.xlsx]

## Sheet: GO_Terms_AIEC_SIG+Rib
Category	Term	Count	%	PValue	Genes	List Total	Pop Hits	Pop Total	Fold Enrichment	Bonferroni	Benjamini	FDR
GOTERM_BP_FAT	GO:0006414~translational elongation	27	5.83153	6.50624e-17	ENSG00000131469, ENSG00000174444, ENSG00000109618, ENSG00000118181, ENSG00000071082, ENSG00000105193, ENSG00000138326, ENSG00000063177, ENSG00000156482, ENSG00000145592, ENSG00000197756, ENSG00000134419, ENSG00000100316, ENSG00000198242, ENSG00000188846, ENSG00000144713, ENSG00000147604, ENSG00000186468, ENSG00000105640, ENSG00000110700, ENSG00000105372, ENSG00000182899, ENSG00000172809, ENSG0000…	368	37	3133	6.21262	1.99729e-13	1.99729e-13	1.88738e-13
GOTERM_BP_FAT	GO:0006412~translation	45	9.71922	1.6398e-13	ENSG00000131469, ENSG00000174444, ENSG00000109618, ENSG00000106305, ENSG00000118181, ENSG00000172053, ENSG00000071082, ENSG00000130811, ENSG00000138326, ENSG00000105193, ENSG00000185088, ENSG00000137547, ENSG00000156482, ENSG00000063177, ENSG00000145592, ENSG00000197756, ENSG00000104408, ENSG00000161960, ENSG00000134419, ENSG00000065427, ENSG00000100353, ENSG00000100316, ENSG00000084623, ENSG0000…	368	118	3133	3.24671	2.95e-10	1.475e-10	2.78444e-10
GOTERM_BP_FAT	GO:0042274~ribosomal small subunit biogenesis	5	1.07991	0.00229191	ENSG00000105372, ENSG00000138326, ENSG00000164587, ENSG00000105193, ENSG00000137154	368	6	3133	7.09466	0.983883	0.747403	3.82133
GOTERM_BP_FAT	GO:0006413~translational initiation	9	1.94384	0.00237533	ENSG00000104408, ENSG00000125977, ENSG00000149273, ENSG00000130811, ENSG00000100353, ENSG00000084623, ENSG00000100664, ENSG00000115211, ENSG00000149100	368	22	3133	3.48283	0.986134	0.656846	3.95779
GOTERM_BP_FAT	GO:0008654~phospholipid biosynthetic process	11	2.37581	0.00331319	ENSG00000151665, ENSG00000111666, ENSG00000103502, ENSG00000111684, ENSG00000049860, ENSG00000011405, ENSG00000169692, ENSG00000161395, ENSG00000110721, ENSG00000063176, ENSG00000182858	368	33	3133	2.83786	0.997447	0.697013	5.47948
GOTERM_BP_FAT	GO:0008610~lipid biosynthetic process	22	4.75162	0.00375996	ENSG00000111666, ENSG00000168350, ENSG00000164494, ENSG00000112357, ENSG00000166391, ENSG00000103502, ENSG00000148334, ENSG00000111684, ENSG00000161395, ENSG00000049860, ENSG00000110721, ENSG00000148459, ENSG00000063176, ENSG00000090054, ENSG00000052802, ENSG00000172893, ENSG00000151665, ENSG00000169692, ENSG00000001626, ENSG00000011405, ENSG00000132356, ENSG00000182858	368	98	3133	1.91121	0.99886	0.676801	6.19636
GOTERM_BP_FAT	GO:0018196~peptidyl-asparagine modification	5	1.07991	0.00485549	ENSG00000118705, ENSG00000134910, ENSG00000163902, ENSG00000102158, ENSG00000163527	368	7	3133	6.08113	0.999843	0.713753	7.93264
GOTERM_BP_FAT	GO:0018279~protein amino acid N-linked glycosylation via asparagine	5	1.07991	0.00485549	ENSG00000118705, ENSG00000134910, ENSG00000163902, ENSG00000102158, ENSG00000163527	368	7	3133	6.08113	0.999843	0.713753	7.93264
GOTERM_BP_FAT	GO:0033209~tumor necrosis factor-mediated signaling pathway	4	0.863931	0.00582641	ENSG00000102871, ENSG00000129235, ENSG00000149600, ENSG00000137275	368	4	3133	8.51359	0.999973	0.731269	9.44609
GOTERM_BP_FAT	GO:0045017~glycerolipid biosynthetic process	9	1.94384	0.00585597	ENSG00000151665, ENSG00000111666, ENSG00000112357, ENSG00000166391, ENSG00000011405, ENSG00000169692, ENSG00000161395, ENSG00000110721, ENSG00000182858	368	25	3133	3.06489	0.999974	0.690867	9.4918
GOTERM_BP_FAT	GO:0005996~monosaccharide metabolic process	16	3.45572	0.00668502	ENSG00000112699, ENSG00000013288, ENSG00000142657, ENSG00000143891, ENSG00000049860, ENSG00000124357, ENSG00000013375, ENSG00000177156, ENSG00000101346, ENSG00000171174, ENSG00000109814, ENSG00000117308, ENSG00000132356, ENSG00000156958, ENSG00000156510, ENSG00000117143	368	65	3133	2.09565	0.999994	0.700809	10.7649
GOTERM_BP_FAT	GO:0043413~biopolymer glycosylation	13	2.80778	0.00760452	ENSG00000080815, ENSG00000142484, ENSG00000139629, ENSG00000163902, ENSG00000102158, ENSG00000135775, ENSG00000118705, ENSG00000101346, ENSG00000120697, ENSG00000109586, ENSG00000134910, ENSG00000163527, ENSG00000182858	368	48	3133	2.30576	0.999999	0.713047	12.1573
GOTERM_BP_FAT	GO:0070085~glycosylation	13	2.80778	0.00760452	ENSG00000080815, ENSG00000142484, ENSG00000139629, ENSG00000163902, ENSG00000102158, ENSG00000135775, ENSG00000118705, ENSG00000101346, ENSG00000120697, ENSG00000109586, ENSG00000134910, ENSG00000163527, ENSG00000182858	368	48	3133	2.30576	0.999999	0.713047	12.1573
GOTERM_BP_FAT	GO:0006486~protein amino acid glycosylation	13	2.80778	0.00760452	ENSG00000080815, ENSG00000142484, ENSG00000139629, ENSG00000163902, ENSG00000102158, ENSG00000135775, ENSG00000118705, ENSG00000101346, ENSG00000120697, ENSG00000109586, ENSG00000134910, ENSG00000163527, ENSG00000182858	368	48	3133	2.30576	0.999999	0.713047	12.1573
GOTERM_BP_FAT	GO:0043433~negative regulation of transcription factor activity	7	1.51188	0.00992998	ENSG00000185187, ENSG00000101076, ENSG00000101665, ENSG00000149273, ENSG00000117318, ENSG00000149600, ENSG00000153879	368	17	3133	3.50559	1	0.776	15.5879
GOTERM_BP_FAT	GO:0009101~glycoprotein biosynthetic process	14	3.02376	0.0124281	ENSG00000080815, ENSG00000142484, ENSG00000139629, ENSG00000163902, ENSG00000102158, ENSG00000135775, ENSG00000118705, ENSG00000101346, ENSG00000145901, ENSG00000120697, ENSG00000109586, ENSG00000134910, ENSG00000163527, ENSG00000182858	368	57	3133	2.09106	1	0.822828	19.1325
GOTERM_BP_FAT	GO:0043392~negative regulation of DNA binding	7	1.51188	0.0134579	ENSG00000185187, ENSG00000101076, ENSG00000101665, ENSG00000149273, ENSG00000117318, ENSG00000149600, ENSG00000153879	368	18	3133	3.31084	1	0.824669	20.5525
GOTERM_BP_FAT	GO:0006903~vesicle targeting	5	1.07991	0.0144283	ENSG00000080815, ENSG00000170348, ENSG00000122218, ENSG00000105669, ENSG00000184432	368	9	3133	4.72977	1	0.825013	21.8692
GOTERM_BP_FAT	GO:0006364~rRNA processing	9	1.94384	0.015284	ENSG00000188846, ENSG00000105372, ENSG00000182899, ENSG00000147604, ENSG00000138326, ENSG00000164587, ENSG00000105193, ENSG00000164346, ENSG00000137154	368	29	3133	2.64215	1	0.823028	23.0131
GOTERM_BP_FAT	GO:0019637~organophosphate metabolic process	13	2.80778	0.0169713	ENSG00000151665, ENSG00000111666, ENSG00000177156, ENSG00000103502, ENSG00000111684, ENSG00000169692, ENSG00000161395, ENSG00000049860, ENSG00000011405, ENSG00000110721, ENSG00000063176, ENSG00000130768, ENSG00000182858	368	53	3133	2.08824	1	0.836571	25.2226
GOTERM_BP_FAT	GO:0051100~negative regulation of binding	7	1.51188	0.0177766	ENSG00000185187, ENSG00000101076, ENSG00000101665, ENSG00000149273, ENSG00000117318, ENSG00000149600, ENSG00000153879	368	19	3133	3.13658	1	0.833482	26.256
GOTERM_BP_FAT	GO:0031398~positive regulation of protein ubiquitination	9	1.94384	0.0187784	ENSG00000101665, ENSG00000205220, ENSG00000143947, ENSG00000108344, ENSG00000134057, ENSG00000100567, ENSG00000151876, ENSG00000092010, ENSG00000164162	368	30	3133	2.55408	1	0.83386	27.5229
GOTERM_BP_FAT	GO:0016072~rRNA metabolic process	9	1.94384	0.0187784	ENSG00000188846, ENSG00000105372, ENSG00000182899, ENSG00000147604, ENSG00000138326, ENSG00000164587, ENSG00000105193, ENSG00000164346, ENSG00000137154	368	30	3133	2.55408	1	0.83386	27.5229
GOTERM_BP_FAT	GO:0051101~regulation of DNA binding	10	2.15983	0.0197985	ENSG00000185187, ENSG00000101076, ENSG00000104365, ENSG00000101665, ENSG00000149273, ENSG00000117318, ENSG00000107223, ENSG00000149600, ENSG00000137275, ENSG00000153879	368	36	3133	2.36489	1	0.834492	28.7917
GOTERM_BP_FAT	GO:0006644~phospholipid metabolic process	12	2.59179	0.0200264	ENSG00000151665, ENSG00000111666, ENSG00000103502, ENSG00000111684, ENSG00000049860, ENSG00000011405, ENSG00000169692, ENSG00000161395, ENSG00000110721, ENSG00000063176, ENSG00000130768, ENSG00000182858	368	48	3133	2.1284	1	0.823247	29.0723
GOTERM_BP_FAT	GO:0006650~glycerophospholipid metabolic process	8	1.72786	0.0210435	ENSG00000151665, ENSG00000111666, ENSG00000103502, ENSG00000011405, ENSG00000169692, ENSG00000161395, ENSG00000110721, ENSG00000182858	368	25	3133	2.72435	1	0.824331	30.3121
GOTERM_BP_FAT	GO:0006643~membrane lipid metabolic process	7	1.51188	0.0229582	ENSG00000166224, ENSG00000177628, ENSG00000049860, ENSG00000121578, ENSG00000063176, ENSG00000090054, ENSG00000130768	368	20	3133	2.97976	1	0.837433	32.5907
GOTERM_BP_FAT	GO:0046474~glycerophospholipid biosynthetic process	7	1.51188	0.0229582	ENSG00000151665, ENSG00000111666, ENSG00000011405, ENSG00000169692, ENSG00000161395, ENSG00000110721, ENSG00000182858	368	20	3133	2.97976	1	0.837433	32.5907
GOTERM_BP_FAT	GO:0046486~glycerolipid metabolic process	10	2.15983	0.0235516	ENSG00000151665, ENSG00000111666, ENSG00000112357, ENSG00000166391, ENSG00000103502, ENSG00000011405, ENSG00000169692, ENSG00000161395, ENSG00000110721, ENSG00000182858	368	37	3133	2.30097	1	0.832456	33.2825
GOTERM_BP_FAT	GO:0051098~regulation of binding	11	2.37581	0.0236077	ENSG00000185187, ENSG00000080815, ENSG00000101076, ENSG00000104365, ENSG00000101665, ENSG00000149273, ENSG00000117318, ENSG00000107223, ENSG00000149600, ENSG00000137275, ENSG00000153879	368	43	3133	2.17789	1	0.820788	33.3476
GOTERM_BP_FAT	GO:0019221~cytokine-mediated signaling pathway	6	1.2959	0.0237869	ENSG00000102871, ENSG00000168610, ENSG00000129235, ENSG00000198001, ENSG00000149600, ENSG00000137275	368	15	3133	3.40543	1	0.810953	33.555
GOTERM_BP_FAT	GO:0006917~induction of apoptosis	16	3.45572	0.0246413	ENSG00000139842, ENSG00000080815, ENSG00000112378, ENSG00000042286, ENSG00000130762, ENSG00000129465, ENSG00000185088, ENSG00000153879, ENSG00000168040, ENSG00000102871, ENSG00000156709, ENSG00000136305, ENSG00000149273, ENSG00000143947, ENSG00000167657, ENSG00000137275	368	75	3133	1.81623	1	0.810319	34.5357
GOTERM_BP_FAT	GO:0012502~induction of programmed cell death	16	3.45572	0.0246413	ENSG00000139842, ENSG00000080815, ENSG00000112378, ENSG00000042286, ENSG00000130762, ENSG00000129465, ENSG00000185088, ENSG00000153879, ENSG00000168040, ENSG00000102871, ENSG00000156709, ENSG00000136305, ENSG00000149273, ENSG00000143947, ENSG00000167657, ENSG00000137275	368	75	3133	1.81623	1	0.810319	34.5357
GOTERM_BP_FAT	GO:0042981~regulation of apoptosis	34	7.34341	0.0264475	ENSG00000139842, ENSG00000104365, ENSG00000112378, ENSG00000185088, ENSG00000063176, ENSG00000153879, ENSG00000156709, ENSG00000136305, ENSG00000172757, ENSG00000117318, ENSG00000196975, ENSG00000115267, ENSG00000167657, ENSG00000141736, ENSG00000080815, ENSG00000042286, ENSG00000139644, ENSG00000177425, ENSG00000130762, ENSG00000129465, ENSG00000108179, ENSG00000102871, ENSG00000168040, ENSG0000…	368	202	3133	1.43298	1	0.821315	36.564
GOTERM_BP_FAT	GO:0051090~regulation of transcription factor activity	9	1.94384	0.0274126	ENSG00000185187, ENSG00000101076, ENSG00000104365, ENSG00000101665, ENSG00000149273, ENSG00000117318, ENSG00000149600, ENSG00000137275, ENSG00000153879	368	32	3133	2.39445	1	0.821696	37.6233
GOTERM_BP_FAT	GO:0043067~regulation of programmed cell death	34	7.34341	0.0282326	ENSG00000139842, ENSG00000104365, ENSG00000112378, ENSG00000185088, ENSG00000063176, ENSG00000153879, ENSG00000156709, ENSG00000136305, ENSG00000172757, ENSG00000117318, ENSG00000196975, ENSG00000115267, ENSG00000167657, ENSG00000141736, ENSG00000080815, ENSG00000042286, ENSG00000139644, ENSG00000177425, ENSG00000130762, ENSG00000129465, ENSG00000108179, ENSG00000102871, ENSG00000168040, ENSG0000…	368	203	3133	1.42592	1	0.820462	38.5104
GOTERM_BP_FAT	GO:0051248~negative regulation of protein metabolic process	12	2.59179	0.030651	ENSG00000080815, ENSG00000101076, ENSG00000104408, ENSG00000101665, ENSG00000205220, ENSG00000143947, ENSG00000108344, ENSG00000100567, ENSG00000085231, ENSG00000092010, ENSG00000115211, ENSG00000164162	368	51	3133	2.0032	1	0.835785	41.0578
GOTERM_BP_FAT	GO:0032269~negative regulation of cellular protein metabolic process	12	2.59179	0.030651	ENSG00000080815, ENSG00000101076, ENSG00000104408, ENSG00000101665, ENSG00000205220, ENSG00000143947, ENSG00000108344, ENSG00000100567, ENSG00000085231, ENSG00000092010, ENSG00000115211, ENSG00000164162	368	51	3133	2.0032	1	0.835785	41.0578
GOTERM_BP_FAT	GO:0010941~regulation of cell death	34	7.34341	0.0320829	ENSG00000139842, ENSG00000104365, ENSG00000112378, ENSG00000185088, ENSG00000063176, ENSG00000153879, ENSG00000156709, ENSG00000136305, ENSG00000172757, ENSG00000117318, ENSG00000196975, ENSG00000115267, ENSG00000167657, ENSG00000141736, ENSG00000080815, ENSG00000042286, ENSG00000139644, ENSG00000177425, ENSG00000130762, ENSG00000129465, ENSG00000108179, ENSG00000102871, ENSG00000168040, ENSG0000…	368	205	3133	1.41201	1	0.840104	42.519
GOTERM_BP_FAT	GO:0044092~negative regulation of molecular function	18	3.88769	0.0323592	ENSG00000185187, ENSG00000080815, ENSG00000101076, ENSG00000153113, ENSG00000101665, ENSG00000205220, ENSG00000108344, ENSG00000100567, ENSG00000149600, ENSG00000092010, ENSG00000153879, ENSG00000198373, ENSG00000169727, ENSG00000149273, ENSG00000117318, ENSG00000143947, ENSG00000142546, ENSG00000164162	368	91	3133	1.68401	1	0.833579	42.7969
GOTERM_BP_FAT	GO:0010498~proteasomal protein catabolic process	10	2.15983	0.03253	ENSG00000165280, ENSG00000107566, ENSG00000205220, ENSG00000143947, ENSG00000108344, ENSG00000134057, ENSG00000100567, ENSG00000136986, ENSG00000092010, ENSG00000164162	368	39	3133	2.18297	1	0.826198	42.9681
GOTERM_BP_FAT	GO:0043161~proteasomal ubiquitin-dependent protein catabolic process	10	2.15983	0.03253	ENSG00000165280, ENSG00000107566, ENSG00000205220, ENSG00000143947, ENSG00000108344, ENSG00000134057, ENSG00000100567, ENSG00000136986, ENSG00000092010, ENSG00000164162	368	39	3133	2.18297	1	0.826198	42.9681
GOTERM_BP_FAT	GO:0043065~positive regulation of apoptosis	19	4.10367	0.0328533	ENSG00000080815, ENSG00000139842, ENSG00000112378, ENSG00000042286, ENSG00000177425, ENSG00000130762, ENSG00000129465, ENSG00000185088, ENSG00000153879, ENSG00000168040, ENSG00000102871, ENSG00000156709, ENSG00000136305, ENSG00000149273, ENSG00000117318, ENSG00000143947, ENSG00000167657, ENSG00000137154, ENSG00000137275	368	98	3133	1.65059	1	0.8204	43.2909
GOTERM_BP_FAT	GO:0043068~positive regulation of programmed cell death	19	4.10367	0.0328533	ENSG00000080815, ENSG00000139842, ENSG00000112378, ENSG00000042286, ENSG00000177425, ENSG00000130762, ENSG00000129465, ENSG00000185088, ENSG00000153879, ENSG00000168040, ENSG00000102871, ENSG00000156709, ENSG00000136305, ENSG00000149273, ENSG00000117318, ENSG00000143947, ENSG00000167657, ENSG00000137154, ENSG00000137275	368	98	3133	1.65059	1	0.8204	43.2909
GOTERM_BP_FAT	GO:0048193~Golgi vesicle transport	12	2.59179	0.0349513	ENSG00000165280, ENSG00000122705, ENSG00000170348, ENSG00000150961, ENSG00000170310, ENSG00000168818, ENSG00000122218, ENSG00000101310, ENSG00000105669, ENSG00000061987, ENSG00000184432, ENSG00000135775	368	52	3133	1.96467	1	0.830999	45.3441
GOTERM_BP_FAT	GO:0010942~positive regulation of cell death	19	4.10367	0.0359858	ENSG00000080815, ENSG00000139842, ENSG00000112378, ENSG00000042286, ENSG00000177425, ENSG00000130762, ENSG00000129465, ENSG00000185088, ENSG00000153879, ENSG00000168040, ENSG00000102871, ENSG00000156709, ENSG00000136305, ENSG00000149273, ENSG00000117318, ENSG00000143947, ENSG00000167657, ENSG00000137154, ENSG00000137275	368	99	3133	1.63392	1	0.83169	46.3305
GOTERM_BP_FAT	GO:0006487~protein amino acid N-linked glycosylation	7	1.51188	0.0361522	ENSG00000118705, ENSG00000134910, ENSG00000142484, ENSG00000163902, ENSG00000102158, ENSG00000163527, ENSG00000182858	368	22	3133	2.70887	1	0.825045	46.4875
GOTERM_BP_FAT	GO:0009100~glycoprotein metabolic process	15	3.23974	0.0366217	ENSG00000080815, ENSG00000142484, ENSG00000139629, ENSG00000163902, ENSG00000102158, ENSG00000135775, ENSG00000118705, ENSG00000101346, ENSG00000145901, ENSG00000120697, ENSG00000109586, ENSG00000134910, ENSG00000151092, ENSG00000163527, ENSG00000182858	368	72	3133	1.77366	1	0.821114	46.9285
GOTERM_BP_FAT	GO:0051438~regulation of ubiquitin-protein ligase activity	8	1.72786	0.0381407	ENSG00000101665, ENSG00000205220, ENSG00000143947, ENSG00000108344, ENSG00000134057, ENSG00000100567, ENSG00000092010, ENSG00000164162	368	28	3133	2.43245	1	0.826043	48.3316
GOTERM_BP_FAT	GO:0048199~vesicle targeting, to, from or within Golgi	4	0.863931	0.0389092	ENSG00000170348, ENSG00000122218, ENSG00000105669, ENSG00000184432	368	7	3133	4.86491	1	0.824718	49.0281
GOTERM_BP_FAT	GO:0007040~lysosome organization	5	1.07991	0.0426522	ENSG00000177628, ENSG00000051009, ENSG00000095066, ENSG00000049860, ENSG00000134709	368	12	3133	3.54733	1	0.84542	52.2961
GOTERM_BP_FAT	GO:0051352~negative regulation of ligase activity	7	1.51188	0.0442586	ENSG00000101665, ENSG00000205220, ENSG00000143947, ENSG00000108344, ENSG00000100567, ENSG00000092010, ENSG00000164162	368	23	3133	2.59109	1	0.849514	53.6372
GOTERM_BP_FAT	GO:0051444~negative regulation of ubiquitin-protein ligase activity	7	1.51188	0.0442586	ENSG00000101665, ENSG00000205220, ENSG00000143947, ENSG00000108344, ENSG00000100567, ENSG00000092010, ENSG00000164162	368	23	3133	2.59109	1	0.849514	53.6372
GOTERM_BP_FAT	GO:0019318~hexose metabolic process	12	2.59179	0.0447937	ENSG00000112699, ENSG00000177156, ENSG00000101346, ENSG00000013288, ENSG00000143891, ENSG00000142657, ENSG00000109814, ENSG00000117308, ENSG00000013375, ENSG00000156510, ENSG00000156958, ENSG00000132356	368	54	3133	1.89191	1	0.846452	54.0761
GOTERM_BP_FAT	GO:0006915~apoptosis	25	5.39957	0.050534	ENSG00000106305, ENSG00000185043, ENSG00000112378, ENSG00000170248, ENSG00000165806, ENSG00000158019, ENSG00000156709, ENSG00000136305, ENSG00000137776, ENSG00000167657, ENSG00000080815, ENSG00000042286, ENSG00000139644, ENSG00000177425, ENSG00000130762, ENSG00000129465, ENSG00000102871, ENSG00000168040, ENSG00000165280, ENSG00000166224, ENSG00000149273, ENSG00000143947, ENSG00000120868, ENSG0000…	368	146	3133	1.45781	1	0.874201	58.5439
GOTERM_BP_FAT	GO:0007033~vacuole organization	6	1.2959	0.0506201	ENSG00000080815, ENSG00000177628, ENSG00000051009, ENSG00000095066, ENSG00000049860, ENSG00000134709	368	18	3133	2.83786	1	0.868868	58.6077
GOTERM_BP_FAT	GO:0031145~anaphase-promoting complex-dependent proteasomal ubiquitin-dependent protein catabolic process	7	1.51188	0.0534145	ENSG00000205220, ENSG00000143947, ENSG00000108344, ENSG00000134057, ENSG00000100567, ENSG00000092010, ENSG00000164162	368	24	3133	2.48313	1	0.877685	60.6285
GOTERM_BP_FAT	GO:0051340~regulation of ligase activity	8	1.72786	0.0535196	ENSG00000101665, ENSG00000205220, ENSG00000143947, ENSG00000108344, ENSG00000134057, ENSG00000100567, ENSG00000092010, ENSG00000164162	368	30	3133	2.27029	1	0.872742	60.7027
GOTERM_BP_FAT	GO:0012501~programmed cell death	25	5.39957	0.0540686	ENSG00000106305, ENSG00000185043, ENSG00000112378, ENSG00000170248, ENSG00000165806, ENSG00000158019, ENSG00000156709, ENSG00000136305, ENSG00000137776, ENSG00000167657, ENSG00000080815, ENSG00000042286, ENSG00000139644, ENSG00000177425, ENSG00000130762, ENSG00000129465, ENSG00000102871, ENSG00000168040, ENSG00000165280, ENSG00000166224, ENSG00000149273, ENSG00000143947, ENSG00000120868, ENSG0000…	368	147	3133	1.44789	1	0.870071	61.0879
GOTERM_BP_FAT	GO:0051650~establishment of vesicle localization	5	1.07991	0.0560897	ENSG00000080815, ENSG00000170348, ENSG00000122218, ENSG00000105669, ENSG00000184432	368	13	3133	3.27446	1	0.874684	62.4759
GOTERM_BP_FAT	GO:0045768~positive regulation of anti-apoptosis	5	1.07991	0.0560897	ENSG00000101665, ENSG00000158019, ENSG00000185088, ENSG00000137275, ENSG00000132356	368	13	3133	3.27446	1	0.874684	62.4759
GOTERM_BP_FAT	GO:0009225~nucleotide-sugar metabolic process	4	0.863931	0.0569623	ENSG00000112699, ENSG00000109814, ENSG00000013375, ENSG00000117143	368	8	3133	4.25679	1	0.873664	63.0606
GOTERM_BP_FAT	GO:0006041~glucosamine metabolic process	4	0.863931	0.0569623	ENSG00000049860, ENSG00000013375, ENSG00000124357, ENSG00000117143	368	8	3133	4.25679	1	0.873664	63.0606
GOTERM_BP_FAT	GO:0006044~N-acetylglucosamine metabolic process	4	0.863931	0.0569623	ENSG00000049860, ENSG00000013375, ENSG00000124357, ENSG00000117143	368	8	3133	4.25679	1	0.873664	63.0606
GOTERM_BP_FAT	GO:0031400~negative regulation of protein modification process	9	1.94384	0.0600721	ENSG00000080815, ENSG00000101076, ENSG00000101665, ENSG00000205220, ENSG00000143947, ENSG00000108344, ENSG00000100567, ENSG00000092010, ENSG00000164162	368	37	3133	2.07087	1	0.882733	65.0754
GOTERM_BP_FAT	GO:0031396~regulation of protein ubiquitination	9	1.94384	0.0600721	ENSG00000101665, ENSG00000205220, ENSG00000143947, ENSG00000108344, ENSG00000134057, ENSG00000100567, ENSG00000151876, ENSG00000092010, ENSG00000164162	368	37	3133	2.07087	1	0.882733	65.0754
GOTERM_BP_FAT	GO:0006665~sphingolipid metabolic process	6	1.2959	0.0623499	ENSG00000166224, ENSG00000177628, ENSG00000049860, ENSG00000063176, ENSG00000090054, ENSG00000130768	368	19	3133	2.6885	1	0.887547	66.4851
GOTERM_BP_FAT	GO:0051439~regulation of ubiquitin-protein ligase activity during mitotic cell cycle	7	1.51188	0.0636369	ENSG00000205220, ENSG00000143947, ENSG00000108344, ENSG00000134057, ENSG00000100567, ENSG00000092010, ENSG00000164162	368	25	3133	2.3838	1	0.888141	67.2577
GOTERM_BP_FAT	GO:0051437~positive regulation of ubiquitin-protein ligase activity during mitotic cell cycle	7	1.51188	0.0636369	ENSG00000205220, ENSG00000143947, ENSG00000108344, ENSG00000134057, ENSG00000100567, ENSG00000092010, ENSG00000164162	368	25	3133	2.3838	1	0.888141	67.2577
GOTERM_BP_FAT	GO:0051443~positive regulation of ubiquitin-protein ligase activity	7	1.51188	0.0636369	ENSG00000205220, ENSG00000143947, ENSG00000108344, ENSG00000134057, ENSG00000100567, ENSG00000092010, ENSG00000164162	368	25	3133	2.3838	1	0.888141	67.2577
GOTERM_BP_FAT	GO:0031401~positive regulation of protein modification process	10	2.15983	0.0646496	ENSG00000080815, ENSG00000101665, ENSG00000205220, ENSG00000143947, ENSG00000108344, ENSG00000134057, ENSG00000100567, ENSG00000151876, ENSG00000092010, ENSG00000164162	368	44	3133	1.93491	1	0.887644	67.8539
GOTERM_BP_FAT	GO:0034660~ncRNA metabolic process	15	3.23974	0.0657572	ENSG00000182173, ENSG00000177192, ENSG00000188846, ENSG00000172053, ENSG00000103356, ENSG00000147604, ENSG00000138326, ENSG00000105193, ENSG00000164346, ENSG00000105372, ENSG00000182899, ENSG00000113407, ENSG00000164587, ENSG00000065427, ENSG00000137154	368	78	3133	1.63723	1	0.887534	68.4942
GOTERM_BP_FAT	GO:0006511~ubiquitin-dependent protein catabolic process	15	3.23974	0.0657572	ENSG00000139842, ENSG00000072201, ENSG00000205220, ENSG00000134057, ENSG00000108344, ENSG00000152484, ENSG00000100567, ENSG00000136986, ENSG00000177479, ENSG00000092010, ENSG00000165280, ENSG00000143947, ENSG00000107566, ENSG00000151876, ENSG00000164162	368	78	3133	1.63723	1	0.887534	68.4942
GOTERM_BP_FAT	GO:0051186~cofactor metabolic process	12	2.59179	0.0698229	ENSG00000177156, ENSG00000063854, ENSG00000101076, ENSG00000164494, ENSG00000163541, ENSG00000138413, ENSG00000142657, ENSG00000103274, ENSG00000148459, ENSG00000014919, ENSG00000172340, ENSG00000176974	368	58	3133	1.76143	1	0.898167	70.7431
GOTERM_BP_FAT	GO:0042273~ribosomal large subunit biogenesis	3	0.647948	0.0699232	ENSG00000188846, ENSG00000182899, ENSG00000147604	368	4	3133	6.38519	1	0.89443	70.7966
GOTERM_BP_FAT	GO:0008333~endosome to lysosome transport	3	0.647948	0.0699232	ENSG00000051009, ENSG00000095066, ENSG00000134709	368	4	3133	6.38519	1	0.89443	70.7966
GOTERM_BP_FAT	GO:0045767~regulation of anti-apoptosis	5	1.07991	0.071526	ENSG00000101665, ENSG00000158019, ENSG00000185088, ENSG00000137275, ENSG00000132356	368	14	3133	3.04057	1	0.895948	71.6395
GOTERM_BP_FAT	GO:0051648~vesicle localization	5	1.07991	0.071526	ENSG00000080815, ENSG00000170348, ENSG00000122218, ENSG00000105669, ENSG00000184432	368	14	3133	3.04057	1	0.895948	71.6395
GOTERM_BP_FAT	GO:0006040~amino sugar metabolic process	4	0.863931	0.0782292	ENSG00000049860, ENSG00000013375, ENSG00000124357, ENSG00000117143	368	9	3133	3.78382	1	0.913048	74.9228
GOTERM_BP_FAT	GO:0031397~negative regulation of protein ubiquitination	7	1.51188	0.0872889	ENSG00000101665, ENSG00000205220, ENSG00000143947, ENSG00000108344, ENSG00000100567, ENSG00000092010, ENSG00000164162	368	27	3133	2.20723	1	0.932367	78.795
GOTERM_BP_FAT	GO:0051351~positive regulation of ligase activity	7	1.51188	0.0872889	ENSG00000205220, ENSG00000143947, ENSG00000108344, ENSG00000134057, ENSG00000100567, ENSG00000092010, ENSG00000164162	368	27	3133	2.20723	1	0.932367	78.795
GOTERM_BP_FAT	GO:0009615~response to virus	5	1.07991	0.0888857	ENSG00000105939, ENSG00000088888, ENSG00000068079, ENSG00000134419, ENSG00000115267	368	15	3133	2.83786	1	0.932863	79.4162
GOTERM_BP_FAT	GO:0006732~coenzyme metabolic process	10	2.15983	0.0911501	ENSG00000177156, ENSG00000063854, ENSG00000101076, ENSG00000164494, ENSG00000163541, ENSG00000138413, ENSG00000142657, ENSG00000148459, ENSG00000172340, ENSG00000176974	368	47	3133	1.8114	1	0.934729	80.2678
GOTERM_BP_FAT	GO:0006952~defense response	13	2.80778	0.0935326	ENSG00000185187, ENSG00000088888, ENSG00000123609, ENSG00000163435, ENSG00000115221, ENSG00000153879, ENSG00000144802, ENSG00000145901, ENSG00000168610, ENSG00000120868, ENSG00000115267, ENSG00000115170, ENSG00000102699	368	68	3133	1.6276	1	0.93673	81.128
GOTERM_BP_FAT	GO:0046394~carboxylic acid biosynthetic process	8	1.72786	0.0945141	ENSG00000168350, ENSG00000148334, ENSG00000109814, ENSG00000169692, ENSG00000132356, ENSG00000052802, ENSG00000176974, ENSG00000145293	368	34	3133	2.0032	1	0.935935	81.472
GOTERM_BP_FAT	GO:0016053~organic acid biosynthetic process	8	1.72786	0.0945141	ENSG00000168350, ENSG00000148334, ENSG00000109814, ENSG00000169692, ENSG00000132356, ENSG00000052802, ENSG00000176974, ENSG00000145293	368	34	3133	2.0032	1	0.935935	81.472
GOTERM_BP_FAT	GO:0008219~cell death	28	6.04752	0.095578	ENSG00000106305, ENSG00000185043, ENSG00000112378, ENSG00000170248, ENSG00000165806, ENSG00000158019, ENSG00000155256, ENSG00000156709, ENSG00000136305, ENSG00000137776, ENSG00000167657, ENSG00000102699, ENSG00000080815, ENSG00000042286, ENSG00000139644, ENSG00000177425, ENSG00000130762, ENSG00000129465, ENSG00000102871, ENSG00000168040, ENSG00000165280, ENSG00000166224, ENSG00000149273, ENSG0000…	368	179	3133	1.33173	1	0.935318	81.8382
GOTERM_BP_FAT	GO:0007243~protein kinase cascade	17	3.67171	0.0960621	ENSG00000080815, ENSG00000160691, ENSG00000104365, ENSG00000163512, ENSG00000123609, ENSG00000129465, ENSG00000198001, ENSG00000130175, ENSG00000117676, ENSG00000168610, ENSG00000169727, ENSG00000172009, ENSG00000101049, ENSG00000167657, ENSG00000137275, ENSG00000132356, ENSG00000141736	368	97	3133	1.49207	1	0.933582	82.0026
GOTERM_BP_FAT	GO:0042254~ribosome biogenesis	9	1.94384	0.098831	ENSG00000188846, ENSG00000105372, ENSG00000182899, ENSG00000147604, ENSG00000138326, ENSG00000164587, ENSG00000105193, ENSG00000164346, ENSG00000137154	368	41	3133	1.86884	1	0.936268	82.9161

## Sheet: KEGG_AIEC_SIG+Rib
Category	Term	Count	%	PValue	Genes	List Total	Pop Hits	Pop Total	Fold Enrichment	Bonferroni	Benjamini	FDR
KEGG_PATHWAY	hsa03010:Ribosome	26	5.61555	3.51899e-14	ENSG00000131469, ENSG00000174444, ENSG00000118181, ENSG00000071082, ENSG00000105193, ENSG00000138326, ENSG00000185088, ENSG00000063177, ENSG00000156482, ENSG00000145592, ENSG00000197756, ENSG00000134419, ENSG00000100316, ENSG00000198242, ENSG00000188846, ENSG00000144713, ENSG00000147604, ENSG00000186468, ENSG00000105640, ENSG00000110700, ENSG00000105372, ENSG00000182899, ENSG00000172809, ENSG0000…	183	35	1200	4.87119	4.96236e-12	4.96236e-12	4.15779e-11
KEGG_PATHWAY	hsa00520:Amino sugar and nucleotide sugar metabolism	9	1.94384	0.00831918	ENSG00000112699, ENSG00000109814, ENSG00000100522, ENSG00000049860, ENSG00000117308, ENSG00000013375, ENSG00000124357, ENSG00000156958, ENSG00000117143	183	21	1200	2.8103	0.692078	0.445093	9.39779
KEGG_PATHWAY	hsa04622:RIG-I-like receptor signaling pathway	7	1.51188	0.0324218	ENSG00000102871, ENSG00000168040, ENSG00000104365, ENSG00000088888, ENSG00000163512, ENSG00000115267, ENSG00000137275	183	17	1200	2.7001	0.990412	0.787555	32.2516
KEGG_PATHWAY	hsa04210:Apoptosis	8	1.72786	0.0374071	ENSG00000102871, ENSG00000168040, ENSG00000156709, ENSG00000104365, ENSG00000120868, ENSG00000165806, ENSG00000198001, ENSG00000137275	183	22	1200	2.3845	0.995372	0.739172	36.2624
KEGG_PATHWAY	hsa00600:Sphingolipid metabolism	5	1.07991	0.0709441	ENSG00000168350, ENSG00000166224, ENSG00000177628, ENSG00000063176, ENSG00000090054	183	11	1200	2.98063	0.999969	0.874461	58.0768
KEGG_PATHWAY	hsa00511:Other glycan degradation	4	0.863931	0.0752651	ENSG00000013288, ENSG00000167280, ENSG00000177628, ENSG00000049860	183	7	1200	3.74707	0.999984	0.840997	60.3232
KEGG_PATHWAY	hsa04623:Cytosolic DNA-sensing pathway	4	0.863931	0.0752651	ENSG00000104365, ENSG00000088888, ENSG00000129465, ENSG00000137275	183	7	1200	3.74707	0.999984	0.840997	60.3232

## Sheet: GO_Terms_AIEC_Sig-Rib
Category	Term	Count	%	PValue	Genes	List Total	Pop Hits	Pop Total	Fold Enrichment	Bonferroni	Benjamini	FDR
GOTERM_BP_FAT	GO:0008610~lipid biosynthetic process	22	5.03432	0.00171812	ENSG00000111666, ENSG00000168350, ENSG00000164494, ENSG00000112357, ENSG00000166391, ENSG00000103502, ENSG00000148334, ENSG00000111684, ENSG00000161395, ENSG00000049860, ENSG00000110721, ENSG00000148459, ENSG00000063176, ENSG00000090054, ENSG00000052802, ENSG00000172893, ENSG00000151665, ENSG00000169692, ENSG00000001626, ENSG00000011405, ENSG00000132356, ENSG00000182858	342	98	3100	2.03485	0.952912	0.952912	2.87363
GOTERM_BP_FAT	GO:0008654~phospholipid biosynthetic process	11	2.51716	0.00206026	ENSG00000151665, ENSG00000111666, ENSG00000103502, ENSG00000111684, ENSG00000049860, ENSG00000011405, ENSG00000169692, ENSG00000161395, ENSG00000110721, ENSG00000063176, ENSG00000182858	342	33	3100	3.02144	0.974392	0.839976	3.43651
GOTERM_BP_FAT	GO:0005996~monosaccharide metabolic process	16	3.66133	0.0036738	ENSG00000112699, ENSG00000013288, ENSG00000142657, ENSG00000143891, ENSG00000049860, ENSG00000124357, ENSG00000013375, ENSG00000177156, ENSG00000101346, ENSG00000171174, ENSG00000109814, ENSG00000117308, ENSG00000132356, ENSG00000156958, ENSG00000156510, ENSG00000117143	342	65	3100	2.23122	0.998556	0.886972	6.04996
GOTERM_BP_FAT	GO:0018196~peptidyl-asparagine modification	5	1.14416	0.00384215	ENSG00000118705, ENSG00000134910, ENSG00000163902, ENSG00000102158, ENSG00000163527	342	7	3100	6.47452	0.998931	0.819164	6.31877
GOTERM_BP_FAT	GO:0018279~protein amino acid N-linked glycosylation via asparagine	5	1.14416	0.00384215	ENSG00000118705, ENSG00000134910, ENSG00000163902, ENSG00000102158, ENSG00000163527	342	7	3100	6.47452	0.998931	0.819164	6.31877
GOTERM_BP_FAT	GO:0045017~glycerolipid biosynthetic process	9	2.0595	0.00395854	ENSG00000151665, ENSG00000111666, ENSG00000112357, ENSG00000166391, ENSG00000011405, ENSG00000169692, ENSG00000161395, ENSG00000110721, ENSG00000182858	342	25	3100	3.26316	0.999131	0.755773	6.50419
GOTERM_BP_FAT	GO:0006413~translational initiation	8	1.83066	0.00398196	ENSG00000104408, ENSG00000125977, ENSG00000130811, ENSG00000100353, ENSG00000084623, ENSG00000100664, ENSG00000115211, ENSG00000149100	342	20	3100	3.62573	0.999167	0.693237	6.54146
GOTERM_BP_FAT	GO:0006412~translation	19	4.34783	0.00414207	ENSG00000109618, ENSG00000106305, ENSG00000172053, ENSG00000103356, ENSG00000130811, ENSG00000132313, ENSG00000185088, ENSG00000137547, ENSG00000100664, ENSG00000115211, ENSG00000145901, ENSG00000104408, ENSG00000125977, ENSG00000161960, ENSG00000113407, ENSG00000065427, ENSG00000100353, ENSG00000084623, ENSG00000149100	342	85	3100	2.02614	0.999374	0.651347	6.79586
GOTERM_BP_FAT	GO:0006486~protein amino acid glycosylation	13	2.97483	0.00456732	ENSG00000080815, ENSG00000142484, ENSG00000139629, ENSG00000163902, ENSG00000102158, ENSG00000135775, ENSG00000118705, ENSG00000101346, ENSG00000120697, ENSG00000109586, ENSG00000134910, ENSG00000163527, ENSG00000182858	342	48	3100	2.45492	0.999707	0.638264	7.4684
GOTERM_BP_FAT	GO:0070085~glycosylation	13	2.97483	0.00456732	ENSG00000080815, ENSG00000142484, ENSG00000139629, ENSG00000163902, ENSG00000102158, ENSG00000135775, ENSG00000118705, ENSG00000101346, ENSG00000120697, ENSG00000109586, ENSG00000134910, ENSG00000163527, ENSG00000182858	342	48	3100	2.45492	0.999707	0.638264	7.4684
GOTERM_BP_FAT	GO:0043413~biopolymer glycosylation	13	2.97483	0.00456732	ENSG00000080815, ENSG00000142484, ENSG00000139629, ENSG00000163902, ENSG00000102158, ENSG00000135775, ENSG00000118705, ENSG00000101346, ENSG00000120697, ENSG00000109586, ENSG00000134910, ENSG00000163527, ENSG00000182858	342	48	3100	2.45492	0.999707	0.638264	7.4684
GOTERM_BP_FAT	GO:0033209~tumor necrosis factor-mediated signaling pathway	4	0.915332	0.00484998	ENSG00000102871, ENSG00000129235, ENSG00000149600, ENSG00000137275	342	4	3100	9.06433	0.999823	0.617081	7.91292
GOTERM_BP_FAT	GO:0009101~glycoprotein biosynthetic process	14	3.20366	0.00741466	ENSG00000080815, ENSG00000142484, ENSG00000139629, ENSG00000163902, ENSG00000102158, ENSG00000135775, ENSG00000118705, ENSG00000101346, ENSG00000145901, ENSG00000120697, ENSG00000109586, ENSG00000134910, ENSG00000163527, ENSG00000182858	342	57	3100	2.22633	0.999998	0.73353	11.8553
GOTERM_BP_FAT	GO:0019637~organophosphate metabolic process	13	2.97483	0.010547	ENSG00000151665, ENSG00000111666, ENSG00000177156, ENSG00000103502, ENSG00000111684, ENSG00000169692, ENSG00000161395, ENSG00000049860, ENSG00000011405, ENSG00000110721, ENSG00000063176, ENSG00000130768, ENSG00000182858	342	53	3100	2.22333	1	0.819653	16.4549
GOTERM_BP_FAT	GO:0006903~vesicle targeting	5	1.14416	0.0115571	ENSG00000080815, ENSG00000170348, ENSG00000122218, ENSG00000105669, ENSG00000184432	342	9	3100	5.03574	1	0.821181	17.8893
GOTERM_BP_FAT	GO:0006644~phospholipid metabolic process	12	2.746	0.0128759	ENSG00000151665, ENSG00000111666, ENSG00000103502, ENSG00000111684, ENSG00000049860, ENSG00000011405, ENSG00000169692, ENSG00000161395, ENSG00000110721, ENSG00000063176, ENSG00000130768, ENSG00000182858	342	48	3100	2.26608	1	0.829917	19.7272
GOTERM_BP_FAT	GO:0006650~glycerophospholipid metabolic process	8	1.83066	0.0152235	ENSG00000151665, ENSG00000111666, ENSG00000103502, ENSG00000011405, ENSG00000169692, ENSG00000161395, ENSG00000110721, ENSG00000182858	342	25	3100	2.90058	1	0.857321	22.9035
GOTERM_BP_FAT	GO:0046486~glycerolipid metabolic process	10	2.28833	0.0161053	ENSG00000151665, ENSG00000111666, ENSG00000112357, ENSG00000166391, ENSG00000103502, ENSG00000011405, ENSG00000169692, ENSG00000161395, ENSG00000110721, ENSG00000182858	342	37	3100	2.44982	1	0.853902	24.0657
GOTERM_BP_FAT	GO:0046474~glycerophospholipid biosynthetic process	7	1.60183	0.0172046	ENSG00000151665, ENSG00000111666, ENSG00000011405, ENSG00000169692, ENSG00000161395, ENSG00000110721, ENSG00000182858	342	20	3100	3.17251	1	0.854476	25.4915
GOTERM_BP_FAT	GO:0006643~membrane lipid metabolic process	7	1.60183	0.0172046	ENSG00000166224, ENSG00000177628, ENSG00000049860, ENSG00000121578, ENSG00000063176, ENSG00000090054, ENSG00000130768	342	20	3100	3.17251	1	0.854476	25.4915
GOTERM_BP_FAT	GO:0019221~cytokine-mediated signaling pathway	6	1.373	0.0184762	ENSG00000102871, ENSG00000168610, ENSG00000129235, ENSG00000198001, ENSG00000149600, ENSG00000137275	342	15	3100	3.62573	1	0.857636	27.1093
GOTERM_BP_FAT	GO:0009100~glycoprotein metabolic process	15	3.43249	0.0226077	ENSG00000080815, ENSG00000142484, ENSG00000139629, ENSG00000163902, ENSG00000102158, ENSG00000135775, ENSG00000118705, ENSG00000101346, ENSG00000145901, ENSG00000120697, ENSG00000109586, ENSG00000134910, ENSG00000151092, ENSG00000163527, ENSG00000182858	342	72	3100	1.8884	1	0.895388	32.1406
GOTERM_BP_FAT	GO:0048193~Golgi vesicle transport	12	2.746	0.0230762	ENSG00000165280, ENSG00000122705, ENSG00000170348, ENSG00000150961, ENSG00000170310, ENSG00000168818, ENSG00000122218, ENSG00000101310, ENSG00000105669, ENSG00000061987, ENSG00000184432, ENSG00000135775	342	52	3100	2.09177	1	0.887356	32.6899
GOTERM_BP_FAT	GO:0043433~negative regulation of transcription factor activity	6	1.373	0.0245124	ENSG00000185187, ENSG00000101076, ENSG00000101665, ENSG00000117318, ENSG00000149600, ENSG00000153879	342	16	3100	3.39912	1	0.889757	34.3483
GOTERM_BP_FAT	GO:0006487~protein amino acid N-linked glycosylation	7	1.60183	0.0274321	ENSG00000118705, ENSG00000134910, ENSG00000142484, ENSG00000163902, ENSG00000102158, ENSG00000163527, ENSG00000182858	342	22	3100	2.8841	1	0.904984	37.6018
GOTERM_BP_FAT	GO:0019318~hexose metabolic process	12	2.746	0.0299641	ENSG00000112699, ENSG00000177156, ENSG00000101346, ENSG00000013288, ENSG00000143891, ENSG00000142657, ENSG00000109814, ENSG00000117308, ENSG00000013375, ENSG00000156510, ENSG00000156958, ENSG00000132356	342	54	3100	2.01429	1	0.914333	40.2997
GOTERM_BP_FAT	GO:0043392~negative regulation of DNA binding	6	1.373	0.0316838	ENSG00000185187, ENSG00000101076, ENSG00000101665, ENSG00000117318, ENSG00000149600, ENSG00000153879	342	17	3100	3.19917	1	0.916886	42.0692
GOTERM_BP_FAT	GO:0051101~regulation of DNA binding	9	2.0595	0.0324508	ENSG00000185187, ENSG00000101076, ENSG00000104365, ENSG00000101665, ENSG00000117318, ENSG00000107223, ENSG00000149600, ENSG00000137275, ENSG00000153879	342	35	3100	2.33083	1	0.913062	42.8423
GOTERM_BP_FAT	GO:0048199~vesicle targeting, to, from or within Golgi	4	0.915332	0.0329477	ENSG00000170348, ENSG00000122218, ENSG00000105669, ENSG00000184432	342	7	3100	5.17962	1	0.907576	43.3379
GOTERM_BP_FAT	GO:0031398~positive regulation of protein ubiquitination	8	1.83066	0.0336948	ENSG00000101665, ENSG00000205220, ENSG00000108344, ENSG00000134057, ENSG00000100567, ENSG00000151876, ENSG00000092010, ENSG00000164162	342	29	3100	2.5005	1	0.903923	44.0756
GOTERM_BP_FAT	GO:0007040~lysosome organization	5	1.14416	0.0347783	ENSG00000177628, ENSG00000051009, ENSG00000095066, ENSG00000049860, ENSG00000134709	342	12	3100	3.7768	1	0.902673	45.1294
GOTERM_BP_FAT	GO:0051098~regulation of binding	10	2.28833	0.0353472	ENSG00000185187, ENSG00000080815, ENSG00000101076, ENSG00000104365, ENSG00000101665, ENSG00000117318, ENSG00000107223, ENSG00000149600, ENSG00000137275, ENSG00000153879	342	42	3100	2.15817	1	0.898113	45.6752
GOTERM_BP_FAT	GO:0051100~negative regulation of binding	6	1.373	0.0400398	ENSG00000185187, ENSG00000101076, ENSG00000101665, ENSG00000117318, ENSG00000149600, ENSG00000153879	342	18	3100	3.02144	1	0.918238	49.9863
GOTERM_BP_FAT	GO:0007033~vacuole organization	6	1.373	0.0400398	ENSG00000080815, ENSG00000177628, ENSG00000051009, ENSG00000095066, ENSG00000049860, ENSG00000134709	342	18	3100	3.02144	1	0.918238	49.9863
GOTERM_BP_FAT	GO:0042981~regulation of apoptosis	31	7.09382	0.0414933	ENSG00000139842, ENSG00000104365, ENSG00000112378, ENSG00000185088, ENSG00000063176, ENSG00000153879, ENSG00000156709, ENSG00000136305, ENSG00000172757, ENSG00000117318, ENSG00000196975, ENSG00000115267, ENSG00000167657, ENSG00000141736, ENSG00000080815, ENSG00000042286, ENSG00000139644, ENSG00000177425, ENSG00000130762, ENSG00000129465, ENSG00000108179, ENSG00000102871, ENSG00000168040, ENSG0000…	342	199	3100	1.41203	1	0.91875	51.2549
GOTERM_BP_FAT	GO:0032269~negative regulation of cellular protein metabolic process	11	2.51716	0.0421139	ENSG00000080815, ENSG00000101076, ENSG00000104408, ENSG00000101665, ENSG00000205220, ENSG00000108344, ENSG00000100567, ENSG00000085231, ENSG00000092010, ENSG00000115211, ENSG00000164162	342	50	3100	1.99415	1	0.915109	51.7873
GOTERM_BP_FAT	GO:0051248~negative regulation of protein metabolic process	11	2.51716	0.0421139	ENSG00000080815, ENSG00000101076, ENSG00000104408, ENSG00000101665, ENSG00000205220, ENSG00000108344, ENSG00000100567, ENSG00000085231, ENSG00000092010, ENSG00000115211, ENSG00000164162	342	50	3100	1.99415	1	0.915109	51.7873
GOTERM_BP_FAT	GO:0043067~regulation of programmed cell death	31	7.09382	0.0439857	ENSG00000139842, ENSG00000104365, ENSG00000112378, ENSG00000185088, ENSG00000063176, ENSG00000153879, ENSG00000156709, ENSG00000136305, ENSG00000172757, ENSG00000117318, ENSG00000196975, ENSG00000115267, ENSG00000167657, ENSG00000141736, ENSG00000080815, ENSG00000042286, ENSG00000139644, ENSG00000177425, ENSG00000130762, ENSG00000129465, ENSG00000108179, ENSG00000102871, ENSG00000168040, ENSG0000…	342	200	3100	1.40497	1	0.917745	53.3601
GOTERM_BP_FAT	GO:0045768~positive regulation of anti-apoptosis	5	1.14416	0.0460012	ENSG00000101665, ENSG00000158019, ENSG00000185088, ENSG00000137275, ENSG00000132356	342	13	3100	3.48628	1	0.920808	54.9996
GOTERM_BP_FAT	GO:0051650~establishment of vesicle localization	5	1.14416	0.0460012	ENSG00000080815, ENSG00000170348, ENSG00000122218, ENSG00000105669, ENSG00000184432	342	13	3100	3.48628	1	0.920808	54.9996
GOTERM_BP_FAT	GO:0051090~regulation of transcription factor activity	8	1.83066	0.0469328	ENSG00000185187, ENSG00000101076, ENSG00000104365, ENSG00000101665, ENSG00000117318, ENSG00000149600, ENSG00000137275, ENSG00000153879	342	31	3100	2.33918	1	0.918923	55.7389
GOTERM_BP_FAT	GO:0051186~cofactor metabolic process	12	2.746	0.0479276	ENSG00000177156, ENSG00000063854, ENSG00000101076, ENSG00000164494, ENSG00000163541, ENSG00000138413, ENSG00000142657, ENSG00000103274, ENSG00000148459, ENSG00000014919, ENSG00000172340, ENSG00000176974	342	58	3100	1.87538	1	0.917388	56.5158
GOTERM_BP_FAT	GO:0006044~N-acetylglucosamine metabolic process	4	0.915332	0.0485026	ENSG00000049860, ENSG00000013375, ENSG00000124357, ENSG00000117143	342	8	3100	4.53216	1	0.914064	56.9589
GOTERM_BP_FAT	GO:0009225~nucleotide-sugar metabolic process	4	0.915332	0.0485026	ENSG00000112699, ENSG00000109814, ENSG00000013375, ENSG00000117143	342	8	3100	4.53216	1	0.914064	56.9589
GOTERM_BP_FAT	GO:0006041~glucosamine metabolic process	4	0.915332	0.0485026	ENSG00000049860, ENSG00000013375, ENSG00000124357, ENSG00000117143	342	8	3100	4.53216	1	0.914064	56.9589
GOTERM_BP_FAT	GO:0010941~regulation of cell death	31	7.09382	0.0493032	ENSG00000139842, ENSG00000104365, ENSG00000112378, ENSG00000185088, ENSG00000063176, ENSG00000153879, ENSG00000156709, ENSG00000136305, ENSG00000172757, ENSG00000117318, ENSG00000196975, ENSG00000115267, ENSG00000167657, ENSG00000141736, ENSG00000080815, ENSG00000042286, ENSG00000139644, ENSG00000177425, ENSG00000130762, ENSG00000129465, ENSG00000108179, ENSG00000102871, ENSG00000168040, ENSG0000…	342	202	3100	1.39106	1	0.911809	57.5689
GOTERM_BP_FAT	GO:0006665~sphingolipid metabolic process	6	1.373	0.0496119	ENSG00000166224, ENSG00000177628, ENSG00000049860, ENSG00000063176, ENSG00000090054, ENSG00000130768	342	19	3100	2.86242	1	0.907407	57.8019
GOTERM_BP_FAT	GO:0043161~proteasomal ubiquitin-dependent protein catabolic process	9	2.0595	0.0504891	ENSG00000165280, ENSG00000107566, ENSG00000205220, ENSG00000108344, ENSG00000134057, ENSG00000100567, ENSG00000136986, ENSG00000092010, ENSG00000164162	342	38	3100	2.14681	1	0.905636	58.4574
GOTERM_BP_FAT	GO:0010498~proteasomal protein catabolic process	9	2.0595	0.0504891	ENSG00000165280, ENSG00000107566, ENSG00000205220, ENSG00000108344, ENSG00000134057, ENSG00000100567, ENSG00000136986, ENSG00000092010, ENSG00000164162	342	38	3100	2.14681	1	0.905636	58.4574
GOTERM_BP_FAT	GO:0006917~induction of apoptosis	14	3.20366	0.052022	ENSG00000080815, ENSG00000102871, ENSG00000168040, ENSG00000139842, ENSG00000156709, ENSG00000042286, ENSG00000112378, ENSG00000136305, ENSG00000130762, ENSG00000129465, ENSG00000167657, ENSG00000185088, ENSG00000137275, ENSG00000153879	342	73	3100	1.73836	1	0.906833	59.5801
GOTERM_BP_FAT	GO:0012502~induction of programmed cell death	14	3.20366	0.052022	ENSG00000080815, ENSG00000102871, ENSG00000168040, ENSG00000139842, ENSG00000156709, ENSG00000042286, ENSG00000112378, ENSG00000136305, ENSG00000130762, ENSG00000129465, ENSG00000167657, ENSG00000185088, ENSG00000137275, ENSG00000153879	342	73	3100	1.73836	1	0.906833	59.5801
GOTERM_BP_FAT	GO:0044092~negative regulation of molecular function	16	3.66133	0.0587051	ENSG00000185187, ENSG00000080815, ENSG00000101076, ENSG00000153113, ENSG00000101665, ENSG00000205220, ENSG00000108344, ENSG00000100567, ENSG00000149600, ENSG00000153879, ENSG00000092010, ENSG00000198373, ENSG00000169727, ENSG00000117318, ENSG00000142546, ENSG00000164162	342	89	3100	1.62954	1	0.92735	64.1493
GOTERM_BP_FAT	GO:0051648~vesicle localization	5	1.14416	0.0589983	ENSG00000080815, ENSG00000170348, ENSG00000122218, ENSG00000105669, ENSG00000184432	342	14	3100	3.23726	1	0.923683	64.3381
GOTERM_BP_FAT	GO:0045767~regulation of anti-apoptosis	5	1.14416	0.0589983	ENSG00000101665, ENSG00000158019, ENSG00000185088, ENSG00000137275, ENSG00000132356	342	14	3100	3.23726	1	0.923683	64.3381
GOTERM_BP_FAT	GO:0007243~protein kinase cascade	17	3.89016	0.0613153	ENSG00000080815, ENSG00000160691, ENSG00000104365, ENSG00000163512, ENSG00000123609, ENSG00000129465, ENSG00000198001, ENSG00000130175, ENSG00000117676, ENSG00000168610, ENSG00000169727, ENSG00000172009, ENSG00000101049, ENSG00000167657, ENSG00000137275, ENSG00000132356, ENSG00000141736	342	97	3100	1.58859	1	0.926825	65.7981
GOTERM_BP_FAT	GO:0008333~endosome to lysosome transport	3	0.686499	0.0622781	ENSG00000051009, ENSG00000095066, ENSG00000134709	342	4	3100	6.79825	1	0.925497	66.3881
GOTERM_BP_FAT	GO:0006952~defense response	13	2.97483	0.0641376	ENSG00000185187, ENSG00000088888, ENSG00000123609, ENSG00000163435, ENSG00000115221, ENSG00000153879, ENSG00000144802, ENSG00000145901, ENSG00000168610, ENSG00000120868, ENSG00000115267, ENSG00000115170, ENSG00000102699	342	68	3100	1.73289	1	0.927022	67.5006
GOTERM_BP_FAT	GO:0016310~phosphorylation	32	7.32265	0.0645507	ENSG00000104365, ENSG00000101665, ENSG00000000457, ENSG00000111816, ENSG00000136643, ENSG00000174292, ENSG00000198001, ENSG00000061987, ENSG00000069956, ENSG00000132964, ENSG00000172757, ENSG00000092439, ENSG00000167657, ENSG00000070759, ENSG00000156958, ENSG00000141736, ENSG00000080815, ENSG00000160691, ENSG00000114354, ENSG00000129465, ENSG00000159199, ENSG00000165629, ENSG00000065883, ENSG0000…	342	215	3100	1.34911	1	0.924055	67.7429
GOTERM_BP_FAT	GO:0006915~apoptosis	23	5.26316	0.0658797	ENSG00000080815, ENSG00000106305, ENSG00000185043, ENSG00000042286, ENSG00000112378, ENSG00000139644, ENSG00000170248, ENSG00000177425, ENSG00000130762, ENSG00000129465, ENSG00000165806, ENSG00000158019, ENSG00000168040, ENSG00000102871, ENSG00000166224, ENSG00000165280, ENSG00000156709, ENSG00000136305, ENSG00000120868, ENSG00000137776, ENSG00000167657, ENSG00000137275, ENSG00000163874	342	144	3100	1.44777	1	0.923972	68.5113
GOTERM_BP_FAT	GO:0006732~coenzyme metabolic process	10	2.28833	0.0664258	ENSG00000177156, ENSG00000063854, ENSG00000101076, ENSG00000164494, ENSG00000163541, ENSG00000138413, ENSG00000142657, ENSG00000148459, ENSG00000172340, ENSG00000176974	342	47	3100	1.92858	1	0.921497	68.822
GOTERM_BP_FAT	GO:0006040~amino sugar metabolic process	4	0.915332	0.0669753	ENSG00000049860, ENSG00000013375, ENSG00000124357, ENSG00000117143	342	9	3100	4.02859	1	0.91906	69.1317
GOTERM_BP_FAT	GO:0051438~regulation of ubiquitin-protein ligase activity	7	1.60183	0.0682729	ENSG00000101665, ENSG00000205220, ENSG00000108344, ENSG00000134057, ENSG00000100567, ENSG00000092010, ENSG00000164162	342	27	3100	2.35001	1	0.918993	69.8515
GOTERM_BP_FAT	GO:0012501~programmed cell death	23	5.26316	0.070082	ENSG00000080815, ENSG00000106305, ENSG00000185043, ENSG00000042286, ENSG00000112378, ENSG00000139644, ENSG00000170248, ENSG00000177425, ENSG00000130762, ENSG00000129465, ENSG00000165806, ENSG00000158019, ENSG00000168040, ENSG00000102871, ENSG00000166224, ENSG00000165280, ENSG00000156709, ENSG00000136305, ENSG00000120868, ENSG00000137776, ENSG00000167657, ENSG00000137275, ENSG00000163874	342	145	3100	1.43779	1	0.920473	70.8289
GOTERM_BP_FAT	GO:0016053~organic acid biosynthetic process	8	1.83066	0.0723048	ENSG00000168350, ENSG00000148334, ENSG00000109814, ENSG00000169692, ENSG00000132356, ENSG00000052802, ENSG00000176974, ENSG00000145293	342	34	3100	2.13278	1	0.923062	71.9889
GOTERM_BP_FAT	GO:0046394~carboxylic acid biosynthetic process	8	1.83066	0.0723048	ENSG00000168350, ENSG00000148334, ENSG00000109814, ENSG00000169692, ENSG00000132356, ENSG00000052802, ENSG00000176974, ENSG00000145293	342	34	3100	2.13278	1	0.923062	71.9889
GOTERM_BP_FAT	GO:0006511~ubiquitin-dependent protein catabolic process	14	3.20366	0.0743291	ENSG00000139842, ENSG00000072201, ENSG00000205220, ENSG00000134057, ENSG00000108344, ENSG00000100567, ENSG00000152484, ENSG00000136986, ENSG00000177479, ENSG00000092010, ENSG00000165280, ENSG00000107566, ENSG00000151876, ENSG00000164162	342	77	3100	1.64806	1	0.924951	73.0074
GOTERM_BP_FAT	GO:0006796~phosphate metabolic process	37	8.46682	0.0794547	ENSG00000104365, ENSG00000081377, ENSG00000165458, ENSG00000101665, ENSG00000000457, ENSG00000111816, ENSG00000143727, ENSG00000136643, ENSG00000174292, ENSG00000198001, ENSG00000061987, ENSG00000163719, ENSG00000069956, ENSG00000132964, ENSG00000172757, ENSG00000092439, ENSG00000167657, ENSG00000112245, ENSG00000070759, ENSG00000156958, ENSG00000141736, ENSG00000080815, ENSG00000160691, ENSG0000…	342	260	3100	1.28992	1	0.934413	75.4328
GOTERM_BP_FAT	GO:0006793~phosphorus metabolic process	37	8.46682	0.0794547	ENSG00000104365, ENSG00000081377, ENSG00000165458, ENSG00000101665, ENSG00000000457, ENSG00000111816, ENSG00000143727, ENSG00000136643, ENSG00000174292, ENSG00000198001, ENSG00000061987, ENSG00000163719, ENSG00000069956, ENSG00000132964, ENSG00000172757, ENSG00000092439, ENSG00000167657, ENSG00000112245, ENSG00000070759, ENSG00000156958, ENSG00000141736, ENSG00000080815, ENSG00000160691, ENSG0000…	342	260	3100	1.28992	1	0.934413	75.4328
GOTERM_BP_FAT	GO:0051444~negative regulation of ubiquitin-protein ligase activity	6	1.373	0.0856833	ENSG00000101665, ENSG00000205220, ENSG00000108344, ENSG00000100567, ENSG00000092010, ENSG00000164162	342	22	3100	2.47209	1	0.944656	78.1041
GOTERM_BP_FAT	GO:0051352~negative regulation of ligase activity	6	1.373	0.0856833	ENSG00000101665, ENSG00000205220, ENSG00000108344, ENSG00000100567, ENSG00000092010, ENSG00000164162	342	22	3100	2.47209	1	0.944656	78.1041
GOTERM_BP_FAT	GO:0006733~oxidoreduction coenzyme metabolic process	5	1.14416	0.0901406	ENSG00000177156, ENSG00000164494, ENSG00000138413, ENSG00000142657, ENSG00000148459	342	16	3100	2.8326	1	0.950092	79.8453
GOTERM_BP_FAT	GO:0051340~regulation of ligase activity	7	1.60183	0.0910999	ENSG00000101665, ENSG00000205220, ENSG00000108344, ENSG00000134057, ENSG00000100567, ENSG00000092010, ENSG00000164162	342	29	3100	2.18794	1	0.949099	80.2027
GOTERM_BP_FAT	GO:0031401~positive regulation of protein modification process	9	2.0595	0.0928221	ENSG00000080815, ENSG00000101665, ENSG00000205220, ENSG00000108344, ENSG00000134057, ENSG00000100567, ENSG00000151876, ENSG00000092010, ENSG00000164162	342	43	3100	1.89718	1	0.949443	80.8292
GOTERM_BP_FAT	GO:0043065~positive regulation of apoptosis	16	3.66133	0.0928908	ENSG00000080815, ENSG00000139842, ENSG00000112378, ENSG00000042286, ENSG00000177425, ENSG00000130762, ENSG00000129465, ENSG00000185088, ENSG00000153879, ENSG00000168040, ENSG00000102871, ENSG00000156709, ENSG00000136305, ENSG00000117318, ENSG00000167657, ENSG00000137275	342	95	3100	1.52662	1	0.946941	80.8538
GOTERM_BP_FAT	GO:0043068~positive regulation of programmed cell death	16	3.66133	0.0928908	ENSG00000080815, ENSG00000139842, ENSG00000112378, ENSG00000042286, ENSG00000177425, ENSG00000130762, ENSG00000129465, ENSG00000185088, ENSG00000153879, ENSG00000168040, ENSG00000102871, ENSG00000156709, ENSG00000136305, ENSG00000117318, ENSG00000167657, ENSG00000137275	342	95	3100	1.52662	1	0.946941	80.8538
GOTERM_BP_FAT	GO:0031400~negative regulation of protein modification process	8	1.83066	0.0929827	ENSG00000080815, ENSG00000101076, ENSG00000101665, ENSG00000205220, ENSG00000108344, ENSG00000100567, ENSG00000092010, ENSG00000164162	342	36	3100	2.01429	1	0.944446	80.8866
GOTERM_BP_FAT	GO:0031396~regulation of protein ubiquitination	8	1.83066	0.0929827	ENSG00000101665, ENSG00000205220, ENSG00000108344, ENSG00000134057, ENSG00000100567, ENSG00000151876, ENSG00000092010, ENSG00000164162	342	36	3100	2.01429	1	0.944446	80.8866
GOTERM_BP_FAT	GO:0008633~activation of pro-apoptotic gene products	3	0.686499	0.0963714	ENSG00000102871, ENSG00000168040, ENSG00000137275	342	5	3100	5.4386	1	0.947768	82.062
GOTERM_BP_FAT	GO:0045022~early endosome to late endosome transport	3	0.686499	0.0963714	ENSG00000051009, ENSG00000095066, ENSG00000134709	342	5	3100	5.4386	1	0.947768	82.062
GOTERM_BP_FAT	GO:0019321~pentose metabolic process	3	0.686499	0.0963714	ENSG00000177156, ENSG00000142657, ENSG00000171174	342	5	3100	5.4386	1	0.947768	82.062
GOTERM_BP_FAT	GO:0016192~vesicle-mediated transport	24	5.49199	0.099143	ENSG00000080815, ENSG00000197324, ENSG00000122705, ENSG00000150961, ENSG00000185359, ENSG00000051009, ENSG00000168818, ENSG00000095066, ENSG00000122218, ENSG00000149182, ENSG00000101310, ENSG00000105669, ENSG00000086598, ENSG00000061987, ENSG00000135775, ENSG00000165280, ENSG00000170348, ENSG00000170310, ENSG00000137942, ENSG00000100266, ENSG00000134709, ENSG00000073350, ENSG00000184432, ENSG0000…	342	159	3100	1.3682	1	0.949838	82.9724
GOTERM_BP_FAT	GO:0010942~positive regulation of cell death	16	3.66133	0.0996013	ENSG00000080815, ENSG00000139842, ENSG00000112378, ENSG00000042286, ENSG00000177425, ENSG00000130762, ENSG00000129465, ENSG00000185088, ENSG00000153879, ENSG00000168040, ENSG00000102871, ENSG00000156709, ENSG00000136305, ENSG00000117318, ENSG00000167657, ENSG00000137275	342	96	3100	1.51072	1	0.948147	83.1187

## Sheet: KEGG_AIEC_Sig-Rib
Category	Term	Count	%	PValue	Genes	List Total	Pop Hits	Pop Total	Fold Enrichment	Bonferroni	Benjamini	FDR
KEGG_PATHWAY	hsa00520:Amino sugar and nucleotide sugar metabolism	9	2.0595	0.00387065	ENSG00000112699, ENSG00000109814, ENSG00000100522, ENSG00000049860, ENSG00000117308, ENSG00000013375, ENSG00000124357, ENSG00000156958, ENSG00000117143	158	21	1168	3.16817	0.421213	0.421213	4.47819
KEGG_PATHWAY	hsa04622:RIG-I-like receptor signaling pathway	7	1.60183	0.0185793	ENSG00000102871, ENSG00000168040, ENSG00000104365, ENSG00000088888, ENSG00000163512, ENSG00000115267, ENSG00000137275	158	17	1168	3.04393	0.928946	0.733441	19.8728
KEGG_PATHWAY	hsa04210:Apoptosis	8	1.83066	0.0202865	ENSG00000102871, ENSG00000168040, ENSG00000156709, ENSG00000104365, ENSG00000120868, ENSG00000165806, ENSG00000198001, ENSG00000137275	158	22	1168	2.68815	0.944413	0.618356	21.504
KEGG_PATHWAY	hsa00600:Sphingolipid metabolism	5	1.14416	0.0483984	ENSG00000168350, ENSG00000166224, ENSG00000177628, ENSG00000063176, ENSG00000090054	158	11	1168	3.36018	0.999083	0.826002	44.3488
KEGG_PATHWAY	hsa04623:Cytosolic DNA-sensing pathway	4	0.915332	0.0553079	ENSG00000104365, ENSG00000088888, ENSG00000129465, ENSG00000137275	158	7	1168	4.22423	0.999672	0.799005	48.9394
KEGG_PATHWAY	hsa00511:Other glycan degradation	4	0.915332	0.0553079	ENSG00000013288, ENSG00000167280, ENSG00000177628, ENSG00000049860	158	7	1168	4.22423	0.999672	0.799005	48.9394

## Sheet: Enrichr_MH_AtlasAIEC_Sig-Rib
Human Gene Atlas
Term	Overlap	P-value	Adjusted P-value	Z-score	Combined Score	Genes
small_intestine	20/220	0.0003080067654171998	0.021560473579203984	-1.797128814832755	14.53048520884352	TMEM45B;DDC;ANXA4;SLC10A2;ACSL5;TMC5;XPNPEP1;GMDS;RBP2;MEP1A;FABP6;GIPC2;TMED2;SUCLG2;ANO10;GALM;SEC24D;CDH17;RBKS;PLS1
colon	22/258	0.0015338381531811815	0.05368433536134135	-1.8438775958431337	11.948293793535493	GALNT7;AHCYL2;PRKAA1;FZD5;TMC5;LRRC1;SSFA2;PTP4A1;PYY;UGDH;FERMT1;MAVS;CASP7;GMDS;ELF3;ETHE1;TMED2;SUCLG2;CDH17;CFTR;TJP3;PLS1
BronchialEpithelialCells	14/280	0.0647059666845909	1	-1.721526848282913	4.713371561581302	SHC1;ITGB4;CORO2A;ANAPC10;FERMT1;TBC1D2;GALE;PERP;ORMDL2;ETHE1;PARD3;ITGB6;UPP1;SEC23B
BDCA4+_DendriticCells	27/495	0.21421314921356233	1	-1.8390083562526145	2.8335141643966235	C9ORF91;SCYL3;CYFIP1;COPA;TMED10;GDI2;RPN1;STX18;NGLY1;AK2;PSEN1;IFI35;TAPBPL;IKBKB;SPTLC1;PRRC1;PDSS2;TBC1D14;SEC23B;CDV3;ALG5;HPS5;TMCO1;NAGK;XPNPEP1;STT3A;PPIB
Kidney	7/142	0.16817678459822424	1	-1.269959602528426	2.2640072275655907	DDC;XPNPEP2;USH1C;DPEP1;SLC3A1;SUCLG1;PEPD
SmoothMuscle	14/363	0.33771534935381164	1	-1.403561930802431	1.523639320738455	COPB2;FAM114A1;WDR1;SHC1;TXNRD1;DAPK3;HDLBP;RPS27L;UAP1;TFG;ZC3H12A;PGM3;TAX1BP3;SEC24D
CD14+_Monocytes	21/383	0.40158669440215655	1	-1.5434177939079838	1.4081091998519781	SLC35A1;APAF1;MTMR14;ARPC1B;STXBP2;CEBPG;TALDO1;GLRX;IFI35;TAPBPL;NUBP1;OCEL1;DSCR3;TBC1D2;SLC7A7;NAGK;DHRS7B;MARVELD3;MLX;FAM32A;IKBKG
CD56+_NKCells	29/752	0.47350176826211055	1	-1.5601556579089193	1.1663717955795396	SLC35B3;DERL1;TAPBPL;IQGAP2;PCSK5;PSMB10;SUV420H1;DSCR3;RPS6KA1;ARIH2;PDSS2;RIPK1;IKBKG;CCDC93;ZBED4;CAST;PARP4;WTAP;RIPK3;GPR108;STX8;COMMD7;TTC38;TMCO1;SMAD7;PARP10;SIGIRR;ELF4;LLGL2
CD33+_Myeloid	27/679	0.4837789890545739	1	-1.5209561011828798	1.1044074593134001	CASZ1;VCP;MTMR14;ARPC1B;CEBPG;INPPL1;MOSPD2;TRMT2A;PCSK5;TM9SF4;SSFA2;DSCR3;KIAA1468;MLX;IKBKG;SEC23B;CAST;SLC35A1;PDCD6IP;APAF1;SPHK2;WWP2;MAVS;EIF5;SLC7A7;CTDSP2;ENGASE
Liver	26/618	0.42621300329574086	1	-1.2647401943499965	1.0785907367440162	KCNK5;PGAP3;MOGAT2;PRKCSH;SHMT1;DNAJC22;PHB;SDSL;SLC22A18;HNF4A;CHID1;CIDEB;LSR;TM4SF5;A1CF;TTC38;OCEL1;GALE;ILVBL;TEP1;EHHADH;DHCR7;HAGH;PPIB;THOP1;RBKS
PancreaticIslet	5/123	0.3948111468897843	1	-1.0511993343182788	0.9769297230642509	IL22RA1;ANXA4;STAT3;ZNF622;CFTR
Pancreas	4/96	0.4537643616715241	1	-0.45829610097774615	0.3621351494736533	IL22RA1;CHMP4C;DPEP1;CDH17
Prostate	10/249	0.6200887568960836	1	-0.62972274889066	0.30093987632135477	PEX7;UPF1;XBP1;PDXDC1;IDH1;ZFYVE19;RIPK4;PACSIN2;HMG20B;CIB1
CD8+_Tcells	19/602	0.6861500027758292	1	-0.746252351382939	0.2810826735394824	EIF4A1;MON2;COG2;ZDHHC6;NOSIP;RSRC2;PCSK7;IRAK4;ZC3HAV1;GNB2L1;SIGIRR;IKBKB;DNMBP;KIAA1468;TRPM7;RIPK1;CDK13;CDK5RAP3;ENGASE
SubthalamicNucleus	2/77	0.5930478362344205	1	-0.3999393147207855	0.20896037916294882	AIM1L;DQX1
CD4+_Tcells	18/533	0.7188899010387108	1	-0.5576183244238555	0.1840402890733951	EIF4A1;MON2;TRADD;ZDHHC6;NOSIP;ALG12;IRAK4;ZC3HAV1;SIGIRR;IKBKB;KIAA1468;ULK3;TRPM7;RIPK1;CDK13;CDK5RAP3;LLGL2;ENGASE
Pons	1/27	0.5092689990586152	1	-0.22822282766588775	0.1539999524072895	SLC39A11
Caudatenucleus	3/69	0.534927253608668	1	-0.19982812590822982	0.12501737453349082	HKDC1;FOXA3;CDC14B
Fetalliver	4/126	0.6317982774478619	1	-0.25848590467009663	0.11869288038857044	EHHADH;NR1H4;GATA5;A1CF
721_B_lymphoblasts	54/1543	0.8060410357587257	1	-0.3948103869749547	0.08512926236425215	SLC35B3;PI4K2B;EIF4A1;MTCH2;GDI2;ATP5C1;ETFA;IFI35;MRPL35;NUBP1;IFIH1;AIFM1;TFG;PSMD3;MLX;GNPNAT1;ACP1;CCT3;PUS1;SND1;PSMA3;SCO1;KARS;PPIF;PSME1;PPIH;THOP1;TSSC1;COX15;GPS1;AK2;MRPS31;TARS;WDR61;MRPL15;FBXO46;PHB;DPP3;CCNB1;PRPSAP2;ANO10;PDSS2;PDSS1;TRPM7;FADD;MAPK6;OSBPL9;PTGES2;CBX3;NFYC;CDC5L;EIF3M;EIF3I;DHCR7
Pituitary	2/84	0.6393221260391612	1	-0.14739617414305095	0.06593721302838673	TBC1D8B;C1GALT1C1
Placenta	13/405	0.7154844445439383	1	-0.18247741400306228	0.061092602626135084	LEPROT;PGAP3;HEXB;ANXA4;SEMA3B;GLRX;SMAD7;LRRC1;TM9SF2;ESRP2;AIM1L;ERBB2;SLC17A5
Lymphnode	1/37	0.6195695927808703	1	-0.11021080922431195	0.05276124794485428	ATP5C1
Thyroid	13/388	0.7808531953922253	1	-0.20304838854567356	0.05022769750587941	ACVR1;TMEM30B;DQX1;ZFYVE21;MAGT1;PIK3C2A;CDC14B;PEX7;CNKSR1;HOOK2;MAN2B2;LMAN2;ID3
Tonsil	1/26	0.4966201556268248	1	-0.03243760755385712	0.022704048799689416	ZNF277
CerebellumPeduncles	1/137	1.0000000000210554	1	2.690173598057324	0.00000000005664262646323252	CCNI
Leukemialymphoblastic(MOLT-4)	2/118	0.9999999999847166	1	2.7914482406284975	-0.00000000004266293499101082	PDSS1;STT3B
Bonemarrow	1/52	0.9999999999709756	1	2.3281337759803167	-0.0000000000675728012355482	LPCAT3
Trachea	1/72	0.9999999999692508	1	2.6203875441789712	-0.00000000008057477083291327	XBP1
FetalThyroid	1/66	0.9999999999657104	1	2.4355774314381	-0.00000000008351490570711032	CNKSR1
TemporalLobe	1/34	0.9999999999347613	1	1.8249414899198735	-0.00000000011905681645648825	MVP
TestisSeminiferousTubule	1/69	0.9999999999479455	1	2.2873897860028345	-0.00000000011906886721503667	TJP3
SkeletalMuscle	3/441	0.9999889474334295	1	2.3391246263419645	-0.000025853473523278695	TNK1;SEC24D;B4GALT4
PrefrontalCortex	5/521	0.9992928539216475	1	2.4173518631464552	-0.0017100255802478877	WSB1;RPS6KC1;LNX1;SSFA2;OTUD3
TestisIntersitial	8/568	0.9989504632676426	1	2.1978331182461193	-0.002307917923473056	PRKAA1;CHKA;XPNPEP1;PPP2R3C;RPS6KC1;TAF9;LRRFIP2;RNF141
CD19+_BCells(neg._sel.)	7/412	0.9983761210773566	1	2.0036966449143936	-0.003256405469322371	SCYL3;NSA2;BTG1;WTAP;PPCS;TESK2;COX7C
Heart	6/415	0.9984784043193735	1	2.157096205261299	-0.0032847279167572095	TMEM115;ILVBL;HNF4A;DAPK3;ATP5C1;ATP5G1
SuperiorCervicalGanglion	10/602	0.9981858377666324	1	2.0126364461162227	-0.00365456502019368	IFIH1;HN1L;MON2;C1GALT1C1;EIF3M;DQX1;ARIH2;USH1C;SGK2;FRK
Fetalbrain	2/325	0.997851044566	1	2.0493455973680637	-0.0044086910963924185	TBC1D14;FNBP1L
Wholebrain	1/240	0.9979209585157006	1	2.271958788044117	-0.004728413559887939	LNX1
Testis	5/384	0.9970349723395232	1	1.8097226148448404	-0.005373848358131423	EIF2B4;UPF1;MTCH2;CHKA;XPNPEP1
TestisLeydigCell	2/107	0.7624793567136193	1	0.026074508861915972	-0.00707088124632075	LRRFIP2;RNFT1
Lung	7/299	0.9960830923346675	1	1.8899458753556	-0.0074172793872001675	PDLIM1;TBC1D2;TMEM115;MVP;STAT3;RIPK4;PACSIN2
retina	2/218	0.9963296064686317	1	2.117796309445722	-0.007787446129545964	ARIH2;GALM
pineal_day	13/694	0.9929996182301918	1	1.5666319427492643	-0.011005588454816818	ABCD4;ACVR1;DDC;TMCO1;PTP4A1;ZFYVE27;HOOK1;ARIH2;RABL3;FAM3A;LRRFIP2;SEC23B;PIGF
CardiacMyocytes	3/273	0.9929117680493373	1	1.7642013335570124	-0.012549598222683919	WDR1;SLC39A9;TXNRD1
Lymphoma_burkitts(Raji)	10/355	0.8073547764237812	1	0.05922935759401598	-0.012674613635740491	TNIP1;SCO1;PRKCSH;NFYC;PPIF;VDAC2;PAWR;ATP5C1;RFXANK;TXNL4A
AtrioventricularNode	5/269	0.9922399530867031	1	1.6386060536389129	-0.012765253640501682	CAST;CLTA;CDC5L;SSFA2;LRRC1
TestisGermCell	4/314	0.987249058067586	1	1.4304373227442038	-0.018356706199007807	ACE2;CHKA;RNF141;TJP3
CD34+	16/645	0.96963330156622	1	0.9597496037622617	-0.02959610429031333	GALNT7;LRBA;NGLY1;AK2;ERLIN1;MRPS31;KEAP1;COMMD7;SLTM;QARS;IMPDH2;PPIH;TBC1D23;ZNF622;STT3B;RBM10
WholeBlood	11/514	0.9782583004055321	1	1.4409141482891779	-0.03167350186382113	APAF1;RP2;ELF4;IRF1;STXBP2;MOSPD2;GLRX;FADD;NMI;CDK13;LRP10
Lymphoma_burkitts(Daudi)	2/139	0.9719598991499421	1	1.1806275425509087	-0.033577910810895284	IMPDH2;EIF2S2
CiliaryGanglion	4/278	0.9738352699542956	1	1.3066869703793746	-0.03464434452834733	CAST;RPS6KC1;KIAA1468;SSFA2
pineal_night	17/674	0.9604811280762412	1	0.9234603785132125	-0.03723479511981807	ACVR1;DDC;AHCYL2;LRBA;DERL1;ARHGAP18;SDSL;TMCO1;CDC14B;PTP4A1;TMEM59;ZFYVE27;HOOK1;HKDC1;RABL3;FAM3A;PIGF
CD105+_Endothelial	11/370	0.9137947451937252	1	0.438733160864863	-0.03955148750056659	CHID1;HN1L;CAST;GALNT6;TXNDC9;PUS1;LRBA;LPCAT3;TAF9;MRPS31;MRPL35
Appendix	1/127	0.9618529623340966	1	1.0810461219426337	-0.04204586820765177	GRAMD1C
Uterus	2/201	0.9650490721172943	1	1.3558727114488032	-0.0482369709542988	OSR2;PAWR
Fetallung	1/41	0.6564222834089093	1	0.11912784039870132	-0.05014698025946475	WSB1
Colorectaladenocarcinoma	5/292	0.9419645999899742	1	0.843417836681302	-0.05042591538213423	CDK8;SGPL1;ITGB4;PSMD3;RABL3
CD71+_EarlyErythroid	13/553	0.9038054411867902	1	0.5438360571856439	-0.055004210586796984	GALNT6;MGST3;USP12;PAWR;TALDO1;CUL4A;CCNB1;EIF5;HECTD3;CHPT1;GPBP1L1;HAGH;ACP1
TrigeminalGanglion	4/196	0.8795715197157112	1	0.4650069568440181	-0.05966987847377365	KIAA1468;RMND1;FBXO4;LLPH
Spinalcord	2/105	0.7534166395850347	1	0.21366614526113525	-0.060496769572125596	USH1C;PSEN1
UterusCorpus	1/98	0.9198265042901165	1	0.7286217921207835	-0.06089107546134984	HDLBP
AdrenalCortex	2/106	0.9346695667739705	1	1.0230513654922768	-0.06911961802541387	RAB20;PIK3C2A
Adipocyte	3/181	0.9464052028957164	1	1.2732065629788434	-0.07013390715344228	LPCAT3;PPIH;AGPAT2
Leukemia_chronicMyelogenousK-562	3/124	0.8284723556058531	1	0.40544146166064715	-0.07629265347590877	AIMP2;TARS;GALK2
GlobusPallidus	1/59	0.7828616279142193	1	0.4621853014901321	-0.11314264706782229	AIM1L
Adrenalgland	1/65	0.8136849298454464	1	0.6266101402787126	-0.12919576451424292	BRE
OlfactoryBulb	2/83	0.8823466038875063	1	1.1469749995195728	-0.14356723373273036	TSPAN15;SSFA2
DorsalRootGanglion	1/69	0.8317690839107689	1	0.8108656916498282	-0.14936180101389673	ZBED4
Mouse Gene Atlas
Term	Overlap	P-value	Adjusted P-value	Z-score	Combined Score	Genes
intestine_small	66/466	0.000000000000000000194956932551	0.000000000000000017351166997038	-1.5952103350855906	61.56374812777321	TMEM45B;MTCH2;PGAP3;MOGAT2;TRADD;DQX1;HNF4G;CIB1;PEPD;PCSK5;CCDC28A;CASP7;TFG;AIM1L;HNF4A;MLX;UPP1;PLS1;OSR2;TMEM150B;AMN;PLA2G12B;ARHGEF16;ACSL5;LSR;TM4SF5;TMC5;ACE2;TMIGD1;SLC7A7;RBP2;ILVBL;HKDC1;CHMP4C;DPEP1;CDH17;CFTR;RBM47;MVP;AK2;USH1C;GATA5;GMDS;HECTD3;MARVELD3;ERBB2;ZBTB7B;FZD5;SLC10A2;NR1H4;CIDEB;CORO2A;TM9SF2;TSPAN15;GALE;DNMBP;XPNPEP1;FABP6;XPNPEP2;LPCAT3;GIPC2;GALM;DEGS2;LPIN3;FRK;TJP3
intestine_large	50/374	0.00000000000002301007574225564	0.000000000001023948370530376	-1.5778364427862002	43.559890823692506	TMEM45B;AHCYL2;ITGB4;TRADD;HEPACAM2;CIB1;PCSK7;C1GALT1C1;SLC39A9;HNF4A;RASSF6;MLX;GNPNAT1;ARHGEF16;SLC35C1;TMC5;SDCBP2;ELF3;ETHE1;CHMP4C;CMPK1;DPEP1;CDH17;B4GALT4;CFTR;LLGL2;PDXDC1;USH1C;IQGAP2;TM9SF4;PDLIM1;GMDS;HECTD3;MARVELD3;ERBB2;RHBDL2;GALNT7;SLC35A1;TMEM30B;TNK1;TM9SF2;PYY;GALE;DNMBP;GIPC2;OCIAD2;DEGS2;FRK;TJP3;FOXA3
kidney	24/554	0.016391106504595392	0.4862694929696633	-1.432310123315383	1.0326845650857384	OSBPL9;KCNK5;RBM47;AMN;COX15;NR1H4;DNAJC22;CIDEB;SLC3A1;PEPD;SIGIRR;PEX7;TMIGD1;SLC7A7;MEP1A;SLC22A18;EHHADH;HNF4A;SUCLG2;CHPT1;GALM;TMBIM6;ITGB6;SGK2
B-cells_GL7negative_Alum	16/379	0.05230849307065918	0.9999999999391973	-1.8800134884629474	0.00000000011430988901549548	CCT3;CDV3;BTG1;TXNDC9;STX8;MRPS31;ZDHHC6;WDR61;ZC3HAV1;COX7C;EIF5;BRE;SLC39A9;MARVELD3;MAPK6;CCDC94
B-cells_marginal_zone	11/380	0.5502592984932138	0.9999999999391973	-1.740030679045148	0.0000000001057985567794123	TSSC1;CCNI;DHRS7B;RMND1;CEBPG;ZDHHC6;CIB1;YBX1;PSEN1;EARS2;SUV420H1
cornea	12/427	0.10177100056700318	0.9999999999391973	-1.6744317226983203	0.00000000010180996336476138	TM9SF2;PARD6B;SPHK2;ESRP2;PARD3;PWWP2B;AIM1L;RIPK4;CHMP4C;MPZL3;DPP3;TXNDC17
adipose_brown	14/456	0.14188782489010346	0.9999999999391973	-1.4558958015600816	0.00000000008852239014014858	MTCH2;PTGES2;RMND1;TALDO1;ETFA;ADIPOR2;AGPAT2;GANC;MFSD8;PTP4A1;AIFM2;DHRS7B;CHPT1;SUCLG1
prostate	13/329	0.2646656060554729	0.9999999999391973	-1.398893492448555	0.00000000008505649605579665	SLC30A7;CHID1;CASZ1;TMEM30B;CHKA;PWWP2B;PAWR;TESK2;SND1;DDOST;PDLIM1;ZFYVE27;FAM3A
macrophage_peri_LPS_thio_7hrs	19/707	0.5386048819692001	0.9999999999391973	-1.3880605170017786	0.00000000008439782194062261	MTMR14;USP12;KEAP1;PAWR;ZC3HAV1;NMI;IFI35;TAPBPL;PSMB10;IFIH1;SGPL1;CASP7;RAB20;TNIP1;SCO1;IRF1;ZC3H12A;AZI2;MAPK6
macrophage_bone_marrow_24h_LPS	14/551	0.5602427789899062	0.9999999999391973	-1.3834254114879332	0.00000000008411599502814872	GHDC;CASZ1;SPHK2;STX8;DERL1;ALG12;RSRC2;GLRX;TM9SF4;OCEL1;MLX;ZBTB7B;THOP1;CCDC93
nih_3T3	8/252	0.322616594672532	0.9999999999391973	-1.293253833915053	0.00000000007863331998993118	POFUT1;CTDSP2;TCEA1;TRPM7;TRMT2A;PDSS1;MRPL15;YBX1
B-cells_GL7_negative_KLH	8/212	0.3541890730915345	0.9999999999391973	-1.2891078584358493	0.0000000000783812335023623	CCT3;QARS;BRE;STX8;MAPK6;COX7C;CCDC94;SUV420H1
lacrimal_gland	24/749	0.6212324815468594	0.9999999999391973	-1.236097981061722	0.0000000000751580900320909	TBC1D8B;SLC30A7;ACVR1;PI4K2B;UPF1;MON2;CASZ1;RBM47;XBP1;HEXB;PWWP2B;HDLBP;EIF2S2;SND1;EIF3M;QARS;SLC39A9;HECTD3;HKDC1;SLC17A5;STT3A;GALM;TMBIM6;CDK5RAP3
mega_erythrocyte_progenitor	16/562	0.5850150376013634	0.9999999999391973	-1.1920480420121282	0.00000000007247973496985398	CCT3;EIF2B4;HMGB2;ZDHHC6;WDR61;MRPL15;SDSL;MRPL35;ARFGAP2;CUL4A;PDE12;EIF3G;PPIF;LLPH;ACP1;RBKS
dendritic_plasmacytoid_B220+	6/214	0.3613366479164111	0.9999999999391973	-1.166701888398761	0.00000000007093862049153049	LIN54;RPS6KA1;ERLIN1;FBRSL1;TRMT2A;CDC14B
stomach	14/249	0.1814473641979371	0.9999999999391973	-1.15620495829312	0.00000000007030037883914732	AHCYL2;MGST3;SLC35C1;SLC39A11;SDCBP2;TSPAN15;UGDH;ELF3;ETHE1;GIPC2;LNX1;OCIAD2;DEGS2;ZBTB7B
liver	26/928	0.3496698392189136	0.9999999999391973	-1.1477397324536893	0.00000000006978567028405734	DDC;SHMT1;DNAJC22;ADIPOR2;PRRC1;HNF4A;GNPNAT1;IKBKG;OSR2;PLA2G12B;LRBA;NR1H4;CIDEB;LSR;A1CF;TTC38;SEPSECS;PEX7;MAVS;EHHADH;SUCLG2;GALM;HAGH;SGK2;FOXA3;RBKS
mast_cells_IgE	14/598	0.6613246934349883	0.9999999999391973	-1.0448673526539087	0.00000000006353075222637525	SCYL3;LEPROT;WTAP;GPATCH2;MOSPD2;ARHGAP18;ZC3HAV1;EIF2S2;CCDC28A;MFSD8;PRRC1;SLTM;FADD;STT3B
macrophage_bone_marrow_2hr_LPS	7/365	0.6626890262941307	0.9999999999391973	-1.0175048552150736	0.00000000006186703860697072	PDLIM1;OSR2;PDE12;MTMR14;NFKBIZ;ZC3H12A;CCDC93
RAW_264_7	6/222	0.5844613967176502	0.9999999999391973	-0.9758041260916976	0.00000000005933152184221836	GALNT7;CYFIP1;PDXDC1;PPP2R3C;TBC1D23;SMPDL3B
C3H_10T1_2	5/155	0.32285911433515113	0.9999999999391973	-0.9278399476004566	0.000000000056415170468305746	GPR39;PDXDC1;CTDSP2;PPP6R3;WWP2
macrophage_bone_marrow_6hr_LPS	20/730	0.7859828009387668	0.9999999999391973	-0.8239801172162123	0.000000000050100212752711073	CCT3;SLC30A6;CYFIP1;SPHK2;MGST3;MTMR14;LRBA;KEAP1;IFI35;FNBP1L;RAB20;TNIP1;POFUT1;ELF4;PPP6R3;ZC3H12A;PDSS2;IKBKG;AZI2;ACP1
T-cells_CD8+	5/166	0.590708507356307	0.9999999999391973	-0.6909026535105519	0.00000000004200874415420932	NSA2;C1GALT1C1;SPTLC1;MRPL15;TAPBPL
T-cells_CD4+	4/191	0.6829729953806699	0.9999999999391973	-0.6059770862280623	0.00000000003684504068600907	NSA2;TMED2;LSR;MAF1
embryonic_stem_line_Bruce4_p13	20/876	0.8178044758545503	0.9999999999391973	-0.5214004712007315	0.0000000000317025544557721	FZD5;SHMT1;MRPS31;DPY30;ZBTB8OS;CDC5L;PHB;MRPL15;EIF2S2;GTF2H3;NUBP1;ANAPC10;CCNB1;KARS;IMPDH2;FBRSL1;TBC1D14;PPIH;UPP1;EARS2
dendritic_cells_myeloid_CD8a-	5/188	0.6727712537857156	0.9999999999391973	-0.49662799542735864	0.000000000030196321136877956	SCYL3;PPP2R3C;SLC39A9;FBRSL1;IRAK4
osteoclasts	2/110	0.6027467633417501	0.9999999999391973	-0.4131891655755482	0.000000000025123015313023896	ABCD4;HEXB
salivary_gland	13/480	0.8748453696340618	0.9999999999391973	-0.3629284677505893	0.000000000022067029371715773	GALNT7;COPB2;MON2;XBP1;PDXDC1;CBX3;HDLBP;ZBTB8OS;IQGAP2;PDLIM1;ERBB2IP;SLC17A5;LNX1
dendritic_cells_lymphoid_CD8a+	6/142	0.7360965918761337	0.9999999999391973	-0.32038314104056737	0.000000000019480158796480296	LRBA;STAT3;ERLIN1;HPS5;CDK13;TXNDC17
adrenal_gland	4/245	0.8277857609007042	0.9999999999391973	-0.2825903766786957	0.000000000017182256825933094	ACVR1;AIFM2;DHCR7;PCSK5
B-cells_GL7_positive_Alum	4/142	0.7360965918761337	0.9999999999391973	-0.18581908493725705	0.000000000011298301372031572	BRE;WDR61;MAPK6;CCDC94
retinal_pigment_epithelium	8/473	0.8661875892160137	0.9999999999391973	-0.1814106863485598	0.000000000011030258851856866	PARD6B;TBC1D2;PDE12;SEMA3B;OCIAD2;ATP5G1;GANC;ANAPC10
macrophage_peri_LPS_thio_1hrs	9/598	0.9228817241012242	0.9999999999391973	-0.17467782141127053	0.000000000010620882510431203	ACVR1;GALNT6;CYFIP1;RAB20;VTA1;IRF1;MARVELD3;NFKBIZ;NFE2L2
iris	3/133	0.7029951050923712	0.9999999999391973	-0.16422659254369157	0.000000000009985419616542483	TMEM59;SEMA3B;OCIAD2
mast_cells	10/515	0.8346112442274661	0.9999999999391973	-0.1618068812683117	0.000000000009838294646942208	SCYL3;MAN2B2;ELF4;P2RY1;ARHGAP18;FAM32A;RFXANK;SDSL;CORO2A;NFE2L2
osteoblast_day5	3/175	0.8317712707667373	0.9999999999391973	-0.07395562088040555	0.000000000004496701149640626	ACVR1;SSR4;ID3
common_myeloid_progenitor	1/80	0.7718041960769766	0.9999999999391973	-0.053256404088194896	0.0000000000032381329591752656	DHRS7B
3T3-L1	3/181	0.8453791518437883	0.9999999999391973	0.031183619328411086	-0.000000000001896048132849545	ABCD4;MTCH2;TRPM7
placenta	8/411	0.873261849998445	0.9999999999391973	0.13045393372640612	-0.000000000007931950902167257	PDLIM1;PARD6B;RPN2;PRKCSH;PARD3;RASSF6;ZFYVE21;WDR61
mIMCD-3	8/300	0.913145226825691	0.9999999999391973	0.2098410837840824	-0.000000000012758903670345926	GPR39;CBX3;PUS1;RABL3;TRMT2A;ACP1;SUV420H1;GET4
MEF	4/300	0.913145226825691	0.9999999999391973	0.23409436584719825	-0.000000000014233568611799574	TXNRD1;TRADD;HDLBP;PIK3C2A
epidermis	6/373	0.9113587196343772	0.9999999999391973	0.2394896138377378	-0.000000000014561614236362553	CASZ1;POF1B;ITGB4;PERP;TNK1;SSFA2
granulo_mono_progenitor	1/124	0.8979981318880392	0.9999999999391973	0.3702552600190663	-0.000000000022512518096232284	STT3A
heart	9/568	0.9491533474522743	0.9999999999391973	0.4050669734413386	-0.00000000002462916413210332	TMEM59;CASZ1;DDC;PPIF;ATP5C1;PDSS2;ETFA;MAF1;ATP5G1
granulocytes_mac1+gr1+	9/557	0.9756967724698106	0.9999999999391973	0.41405657345558583	-0.00000000002517575605084665	TMEM59;ZFYVE27;PRRC1;QARS;SLC39A9;DAPK3;TMED2;IRAK4;ARFGAP2
macrophage_peri_LPS_thio_0hrs	4/353	0.9570715497447336	0.9999999999391973	0.5044509900328665	-0.000000000030671980301353175	GALNT6;SGPL1;NAGK;FADD
mast_cells_IgE+antigen_6hr	2/146	0.9318509803948163	0.9999999999391973	0.5538833677495252	-0.000000000033677602146749136	P2RY1;DERL1
mammary_gland__lact	1/104	0.8528836053256272	0.9999999999391973	0.5731288690555781	-0.00000000003484778051612941	FAM160A2
thymocyte_SP_CD4+	2/203	0.9760814246548963	0.9999999999391973	0.6508670010861393	-0.00000000003957446854215551	PPP6R3;MAPK6
uterus	3/141	0.9253063610141378	0.9999999999391973	0.6528445589368664	-0.000000000039694709391397055	OSR2;STX18;SEC23B
pituitary	5/294	0.9714017093410128	0.9999999999391973	0.6571915876489008	-0.0000000000399590204576044	TBC1D8B;COPA;PRRC1;FAM3A;EARS2
macrophage_bone_marrow_0hr	1/180	0.9634924703098953	0.9999999999391973	0.6701344699510791	-0.000000000040745982598345324	RNF141
min6	4/361	0.9615264350662439	0.9999999999391973	0.6817241069531336	-0.00000000004145066377620105	SEPSECS;HEPACAM2;STT3A;OCIAD2
ciliary_bodies	3/317	0.9800606153669472	0.9999999999391973	0.7003879513016109	-0.00000000004258547583428963	LRBA;PPIH;OCIAD2
pancreas	11/667	0.9835073881315305	0.9999999999391973	0.7501231707198556	-0.000000000045609511271667775	CHID1;RBM47;XBP1;HKDC1;TNK1;ALG5;DAPK3;MAGT1;PSEN1;FOXA3;SSFA2
hippocampus	1/176	0.9607084919307285	0.9999999999391973	0.7556363362366317	-0.00000000004594472659975672	MON2
B-cells_GL7_positive_KLH	3/207	0.977778454027397	0.9999999999391973	0.7991467396899601	-0.000000000048590276443037756	SLC39A9;COX7C;SUV420H1
thymocyte_DP_CD4+CD8+	4/410	0.9806392933029435	0.9999999999391973	0.8275265206367947	-0.00000000005031584364254175	ILVBL;CBX3;MRPS31;LRRC1
osteoblast_day14	3/301	0.9743621761026929	0.9999999999391973	0.8625870199618013	-0.00000000005244761653207884	FAM114A1;HDLBP;ID3
ovary	1/153	0.9400638740643177	0.9999999999391973	0.888297957671639	-0.000000000054010910867003386	IDH1
follicular_B-cells	8/603	0.9862889204410059	0.9999999999391973	0.941786399701078	-0.00000000005726315235863003	IKBKB;SPTLC1;ELF4;PPCS;FBXO4;TRMT2A;CDK13;SUV420H1
Baf3	9/440	0.9874349300889134	0.9999999999391973	1.0172365983420202	-0.00000000006185072786581138	PRRC1;RPN1;ALG5;CEBPG;ZDHHC6;CDK13;SND1;OCEL1;FAM118B
embryonic_stem_line_V26_2_p16	11/728	0.9921501294848248	0.9999999999391973	1.0466050699656348	-0.00000000006363641012418432	HN1L;CCNB1;SHMT1;IMPDH2;CDC5L;DPY30;PPIH;MRPL15;GTF2H3;ACP1;DERA
NK_cells	10/669	0.9941734820624268	0.9999999999391973	1.0824112391408565	-0.00000000006581352175109929	CCT3;MFSD8;GALNT6;SCYL3;WTAP;CBX3;ARIH2;GPATCH2;ZC3HAV1;AZI2
mast_cells_IgE+antigen_1hr	2/265	0.9923688328978243	0.9999999999391973	1.1698741780549542	-0.00000000007113150425579589	PARP4;ARHGAP18
eyecup	15/828	0.997825772386627	0.9999999999391973	1.1995428349567447	-0.0000000000729354385884454	OSBPL9;COPA;TSSC1;DQX1;STAT3;SEMA3B;DAPK3;TM9SF2;IKBKB;ULK3;PDSS2;PPIH;TRPM7;THOP1;RBM10
cerebral_cortex_prefrontal	2/344	0.9870141385123353	0.9999999999391973	1.2107998007853935	-0.0000000000736198924620057	CCNI;SND1
bladder	3/195	0.9722899404972796	0.9999999999391973	1.230061157634723	-0.0000000000747910348911671	CAST;RIPK4;PAWR
lens	9/947	0.9986246296383776	0.9999999999391973	1.3832573855158072	-0.00000000008410577859600964	CASZ1;AKIRIN1;SPTLC1;DNMBP;GDI2;GPR160;PSEN1;DDOST;ARFGAP2
osteoblast_day21	4/264	0.9922266895650134	0.9999999999391973	1.4229399356813592	-0.0000000000865185846386858	FAM114A1;ID3;PCSK5;RNFT1
neuro2a	4/425	0.9965168727400349	0.9999999999391973	1.4607191474953454	-0.00000000008881566257778099	LSM1;PDSS1;EIF3D;GET4
amygdala	2/308	0.9965521520920013	0.9999999999391973	1.4692107357636839	-0.0000000000893319740396273	MON2;TSSC1
bone_marrow	4/413	0.9957567272252696	0.9999999999391973	1.5428072969697688	-0.00000000009380684339296783	EIF5;HMGB2;ACP1;ENGASE
retina	5/664	0.9995954484817543	0.9999999999391973	1.6184524004554222	-0.00000000009840626964021261	ZFYVE27;TFG;PDE12;HOOK1;GNPNAT1
dorsal_root_ganglia	4/541	0.9972228603943736	0.9999999999391973	1.6620087284966378	-0.00000000010105461182225968	ZFYVE27;SEMA3B;CMPK1;CCDC28A
dorsal_striatum	2/477	0.9998507562600714	0.9999999999391973	1.7232925979652973	-0.00000000010478083632032431	CCNI;MRPL35
skeletal_muscle	6/710	0.9990722192551618	0.9999999999391973	1.7502105488287123	-0.000000000106417520309351	AIMP2;CNKSR1;PDSS2;LRRFIP2;GANC;ARFGAP2
cerebellum	2/428	0.9996280184752283	0.9999999999391973	1.7922333331598082	-0.00000000010897261889906218	MTCH2;FBRSL1
T-cells_foxP3+	1/112	0.999999999733523	0.9999999999391973	1.7931253077053295	-0.00000000010902685335638332	PSEN1
nucleus_accumbens	1/383	0.9991412443833625	0.9999999999391973	1.8149999033903144	-0.00000000011035688775260128	SND1
microglia	3/90	0.9999999997239828	0.9999999999391973	1.8150515877400506	-0.00000000011036003030041726	HEXB;GLRX;PIK3C2A
testis	37/3059	0.9999662137393059	0.9999999999391973	1.8370572143225294	-0.00000000011169803172849009	GRAMD1C;PI4K2B;MTCH2;PWWP2B;RMND1;USP12;NGLY1;CEBPG;TAF9;GPATCH2;FBXO46;PPP2R3C;ARIH2;TBC1D14;LRRFIP2;TXNL4A;MAPK6;CCDC93;TPRN;CAST;CDV3;NOSIP;ALG12;WWP2;OCEL1;FAM118B;EIF5;HOOK2;SLTM;HGS;GPR160;TBC1D23;STT3B;PIGF;RNF141;THOP1;OTUD3
stem_cells__HSC	1/186	0.9999999998514202	0.9999999999391973	1.9332284056490556	-0.00000000011754549945916635	TMEM59
C2C12	1/167	0.9999999998363587	0.9999999999391973	2.274422663986382	-0.00000000013829103029849615	PRKAA1
olfactory_bulb	1/414	0.9999999999367268	0.9999999999391973	2.331889691478132	-0.00000000014178518051334544	ACVR1
bone	1/157	0.9999999997676525	0.9999999999391973	2.3634011239464696	-0.0000000001437011605689566	HMGB2
cerebral_cortex	1/349	0.9999999999391973	0.9999999999391973	2.422698400726022	-0.00000000014730659487524634	FAM160A2
adipose_white	1/199	0.9999999997799238	0.9999999999391973	2.5314758162774904	-0.00000000015392055502786566	LMAN2
lung	1/354	0.9999999999262374	0.9999999999391973	2.562434975920773	-0.00000000015580295540666825	B4GALT4

## Sheet: Enrichr_MH_AtlasAIEC_Sig+Rib
Human Gene Atlas
Term	Overlap	P-value	Adjusted P-value	Z-score	Combined Score	Genes
small_intestine	20/220	0.0003828456574173613	0.027182041676632653	-1.797128814832755	14.139591403416366	TMEM45B;DDC;ANXA4;SLC10A2;ACSL5;TMC5;XPNPEP1;GMDS;RBP2;MEP1A;FABP6;GIPC2;TMED2;SUCLG2;ANO10;GALM;SEC24D;CDH17;RBKS;PLS1
colon	22/258	0.0018737435144339685	0.06651789476240588	-1.8438775958431337	11.579213816664177	GALNT7;AHCYL2;PRKAA1;FZD5;TMC5;LRRC1;SSFA2;PTP4A1;PYY;UGDH;FERMT1;MAVS;CASP7;GMDS;ELF3;ETHE1;TMED2;SUCLG2;CDH17;CFTR;TJP3;PLS1
BronchialEpithelialCells	14/280	0.07258639287296374	1	-1.721526848282913	4.515526706372449	SHC1;ITGB4;CORO2A;ANAPC10;FERMT1;TBC1D2;GALE;PERP;ORMDL2;ETHE1;PARD3;ITGB6;UPP1;SEC23B
BDCA4+_DendriticCells	27/495	0.23691227974845688	1	-1.8390083562526145	2.648292182784522	C9ORF91;SCYL3;CYFIP1;COPA;TMED10;GDI2;RPN1;STX18;NGLY1;AK2;PSEN1;IFI35;TAPBPL;IKBKB;SPTLC1;PRRC1;PDSS2;TBC1D14;SEC23B;CDV3;ALG5;HPS5;TMCO1;NAGK;XPNPEP1;STT3A;PPIB
Kidney	7/142	0.17893082106162111	1	-1.269959602528426	2.185290634202146	DDC;XPNPEP2;USH1C;DPEP1;SLC3A1;SUCLG1;PEPD
SmoothMuscle	16/363	0.25359101159923836	1	-1.403561930802431	1.9257325851996456	COPB2;FAM114A1;WDR1;SHC1;TXNRD1;DAPK3;HDLBP;RPS27L;UAP1;TFG;ZC3H12A;RPL14;PGM3;TAX1BP3;RPL38;SEC24D
CD14+_Monocytes	21/383	0.42677281619816976	1	-1.5434177939079838	1.3142255820373978	SLC35A1;APAF1;MTMR14;ARPC1B;STXBP2;CEBPG;TALDO1;GLRX;IFI35;TAPBPL;NUBP1;OCEL1;DSCR3;TBC1D2;SLC7A7;NAGK;DHRS7B;MARVELD3;MLX;FAM32A;IKBKG
CD56+_NKCells	29/752	0.5096658551267842	1	-1.484068092558071	1.0002618261434828	SLC35B3;DERL1;TAPBPL;IQGAP2;PCSK5;PSMB10;SUV420H1;DSCR3;RPS6KA1;ARIH2;PDSS2;RIPK1;IKBKG;CCDC93;ZBED4;CAST;PARP4;WTAP;RIPK3;GPR108;STX8;COMMD7;TTC38;TMCO1;SMAD7;PARP10;SIGIRR;ELF4;LLGL2
Liver	26/618	0.45869240414751894	1	-1.2647401943499965	0.985707441710489	KCNK5;PGAP3;MOGAT2;PRKCSH;SHMT1;DNAJC22;PHB;SDSL;SLC22A18;HNF4A;CHID1;CIDEB;LSR;TM4SF5;A1CF;TTC38;OCEL1;GALE;ILVBL;TEP1;EHHADH;DHCR7;HAGH;PPIB;THOP1;RBKS
PancreaticIslet	5/123	0.4091099014860865	1	-1.0511993343182788	0.9395319545812841	IL22RA1;ANXA4;STAT3;ZNF622;CFTR
CD33+_Myeloid	27/679	0.5180255874772739	1	-1.3667737421634387	0.8989689699019087	CASZ1;VCP;MTMR14;ARPC1B;CEBPG;INPPL1;MOSPD2;TRMT2A;PCSK5;TM9SF4;SSFA2;DSCR3;KIAA1468;MLX;IKBKG;SEC23B;CAST;SLC35A1;PDCD6IP;APAF1;SPHK2;WWP2;MAVS;EIF5;SLC7A7;CTDSP2;ENGASE
Pancreas	4/96	0.4665936309522543	1	-0.45829610097774615	0.3493575455435451	IL22RA1;CHMP4C;DPEP1;CDH17
Prostate	10/249	0.6390288792146982	1	-0.62972274889066	0.2819933930710534	PEX7;UPF1;XBP1;PDXDC1;IDH1;ZFYVE19;RIPK4;PACSIN2;HMG20B;CIB1
CD8+_Tcells	20/602	0.7134966487647688	1	-0.746252351382939	0.2519180322320592	EIF4A1;MON2;RPL3;COG2;ZDHHC6;NOSIP;RSRC2;PCSK7;IRAK4;ZC3HAV1;GNB2L1;SIGIRR;IKBKB;DNMBP;KIAA1468;TRPM7;RIPK1;CDK13;CDK5RAP3;ENGASE
SubthalamicNucleus	2/77	0.6038283487930465	1	-0.3999393147207855	0.20175551125253735	AIM1L;DQX1
Pons	1/27	0.5162361619794704	1	-0.27537152336872645	0.18207315637122784	SLC39A11
CD4+_Tcells	18/533	0.7431022971989885	1	-0.5576183244238555	0.16556890413917238	EIF4A1;MON2;TRADD;ZDHHC6;NOSIP;ALG12;IRAK4;ZC3HAV1;SIGIRR;IKBKB;KIAA1468;ULK3;TRPM7;RIPK1;CDK13;CDK5RAP3;LLGL2;ENGASE
Caudatenucleus	3/69	0.5456056113636569	1	-0.19982812590822982	0.12106764610359472	HKDC1;FOXA3;CDC14B
Fetalliver	4/126	0.6450285611738188	1	-0.25848590467009663	0.1133359061206621	EHHADH;NR1H4;GATA5;A1CF
Tonsil	1/26	0.5035131658026629	1	-0.13789555634128697	0.09461640422887493	ZNF277
Pituitary	2/84	0.6500056744129581	1	-0.14739617414305095	0.06349446697496888	TBC1D8B;C1GALT1C1
Placenta	13/405	0.7366279391288877	1	-0.18247741400306228	0.055778299200881176	LEPROT;PGAP3;HEXB;ANXA4;SEMA3B;GLRX;SMAD7;LRRC1;TM9SF2;ESRP2;AIM1L;ERBB2;SLC17A5
Lymphnode	1/37	0.6268837530381325	1	-0.11021080922431195	0.05146780398912338	ATP5C1
Thyroid	13/388	0.7985355117197575	1	-0.13326282588046146	0.029980916097191446	ACVR1;TMEM30B;DQX1;ZFYVE21;MAGT1;PIK3C2A;CDC14B;PEX7;CNKSR1;HOOK2;MAN2B2;LMAN2;ID3
CerebellumPeduncles	1/137	1.0000000000238183	1	2.752030149013717	0.00000000006554862653127275	CCNI
Leukemialymphoblastic(MOLT-4)	2/118	1.0000000000113036	1	2.852617525017708	0.00000000003224491792358635	PDSS1;STT3B
Tongue	1/115	1.0000000000094458	1	3.145478772257189	0.000000000029711492593162715	RPL37A
Bonemarrow	1/52	1.0000000000076292	1	2.3281337759803167	0.00000000001776186939941361	LPCAT3
Trachea	1/72	0.9999999999802871	1	2.6203875441789712	-0.0000000000516554323286473	XBP1
TestisSeminiferousTubule	1/69	0.9999999999660284	1	2.3400440151809994	-0.00000000007949504700881307	TJP3
TemporalLobe	1/34	0.9999999999395617	1	1.8697366240033135	-0.0000000001130037422975774	MVP
SkeletalMuscle	3/441	0.999991211397331	1	2.414063168959327	-0.000021216335240841717	TNK1;SEC24D;B4GALT4
PrefrontalCortex	5/521	0.9994308213774374	1	2.493374356378963	-0.00141957941716056	WSB1;RPS6KC1;LNX1;SSFA2;OTUD3
TestisIntersitial	8/568	0.9991607432467614	1	2.2720544608070385	-0.0019076376608706813	PRKAA1;CHKA;XPNPEP1;PPP2R3C;RPS6KC1;TAF9;LRRFIP2;RNF141
721_B_lymphoblasts	54/1543	0.8397269773235415	1	0.014679036753789199	-0.0025641116367963886	SLC35B3;PI4K2B;EIF4A1;MTCH2;GDI2;ATP5C1;ETFA;IFI35;MRPL35;NUBP1;IFIH1;AIFM1;TFG;PSMD3;MLX;GNPNAT1;ACP1;CCT3;PUS1;SND1;PSMA3;SCO1;KARS;PPIF;PSME1;PPIH;THOP1;TSSC1;COX15;GPS1;AK2;MRPS31;TARS;WDR61;MRPL15;FBXO46;PHB;DPP3;CCNB1;PRPSAP2;ANO10;PDSS2;PDSS1;TRPM7;FADD;MAPK6;OSBPL9;PTGES2;CBX3;NFYC;CDC5L;EIF3M;EIF3I;DHCR7
CD19+_BCells(neg._sel.)	8/412	0.9986412292305608	1	2.073111702459347	-0.002818799067954172	SCYL3;NSA2;BTG1;WTAP;PPCS;TESK2;RPL35A;COX7C
Heart	6/415	0.9987287890729606	1	2.2271066049070996	-0.00283292325507584	TMEM115;ILVBL;HNF4A;DAPK3;ATP5C1;ATP5G1
SuperiorCervicalGanglion	10/602	0.9985489565856247	1	2.0903340471100655	-0.0030353682114044375	IFIH1;HN1L;MON2;C1GALT1C1;EIF3M;DQX1;ARIH2;USH1C;SGK2;FRK
Fetalbrain	2/325	0.9981518096801466	1	2.1222670765355356	-0.003925982567052002	TBC1D14;FNBP1L
Wholebrain	1/240	0.9981634953112333	1	2.3472983131328027	-0.004314787635704317	LNX1
Testis	5/384	0.9974829128063307	1	1.8805589844397637	-0.004739498307422041	EIF2B4;UPF1;MTCH2;CHKA;XPNPEP1
Lung	7/299	0.996585813445262	1	1.963342991446079	-0.006714688376856315	PDLIM1;TBC1D2;TMEM115;MVP;STAT3;RIPK4;PACSIN2
TestisLeydigCell	2/107	0.772000447155595	1	0.026074508861915972	-0.006747304562606339	LRRFIP2;RNFT1
retina	2/218	0.9967205651783849	1	2.190764611299498	-0.007196276071500526	ARIH2;GALM
pineal_day	13/694	0.9943673998750636	1	1.6420036002987517	-0.009274895162741313	ABCD4;ACVR1;DDC;TMCO1;PTP4A1;ZFYVE27;HOOK1;ARIH2;RABL3;FAM3A;LRRFIP2;SEC23B;PIGF
Lymphoma_burkitts(Raji)	10/355	0.8228635488267649	1	0.05922935759401598	-0.011547645149309926	TNIP1;SCO1;PRKCSH;NFYC;PPIF;VDAC2;PAWR;ATP5C1;RFXANK;TXNL4A
AtrioventricularNode	5/269	0.9931308973372837	1	1.8068117017975538	-0.012453998106259048	CAST;CLTA;CDC5L;SSFA2;LRRC1
TestisGermCell	4/314	0.9887807900875005	1	1.5793915738202062	-0.017819674907967705	ACE2;CHKA;RNF141;TJP3
WholeBlood	11/514	0.9814877616678176	1	1.5868525007740242	-0.02965150428559733	APAF1;RP2;ELF4;IRF1;STXBP2;MOSPD2;GLRX;FADD;NMI;CDK13;LRP10
CiliaryGanglion	4/278	0.9765558517073578	1	1.4734846809528497	-0.03495596995531099	CAST;RPS6KC1;KIAA1468;SSFA2
CardiacMyocytes	4/273	0.9740814818304137	1	1.531420496278875	-0.040215595240294444	WDR1;SLC39A9;TXNRD1;RPL7
pineal_night	17/674	0.9667403763211416	1	1.2223650596943187	-0.041346868784768585	ACVR1;DDC;AHCYL2;LRBA;DERL1;ARHGAP18;SDSL;TMCO1;CDC14B;PTP4A1;TMEM59;ZFYVE27;HOOK1;HKDC1;RABL3;FAM3A;PIGF
CD34+	18/645	0.9516969516258731	1	0.8770111133167036	-0.043419612568996874	GALNT7;RPL3;RPL31;LRBA;NGLY1;AK2;ERLIN1;MRPS31;KEAP1;COMMD7;SLTM;QARS;IMPDH2;PPIH;TBC1D23;ZNF622;STT3B;RBM10
Appendix	1/127	0.9642753744275406	1	1.2041093207924223	-0.04380353083318743	GRAMD1C
CD105+_Endothelial	11/370	0.9224969548703841	1	0.5800251420229239	-0.0467913265725823	CHID1;HN1L;CAST;GALNT6;TXNDC9;PUS1;LRBA;LPCAT3;TAF9;MRPS31;MRPL35
Fetallung	1/41	0.6637168665953759	1	0.11912784039870132	-0.04883045724614509	WSB1
Uterus	2/201	0.967972901999622	1	1.5748006765579314	-0.05126162957719664	OSR2;PAWR
Colorectaladenocarcinoma	5/292	0.947511526314191	1	0.9920878582862039	-0.05348958469007649	CDK8;SGPL1;ITGB4;PSMD3;RABL3
Spinalcord	2/105	0.7630746536404498	1	0.21366614526113525	-0.057775199664530257	USH1C;PSEN1
CD71+_EarlyErythroid	13/553	0.9155318241481168	1	0.6871474124208926	-0.0606408649512782	GALNT6;MGST3;USP12;PAWR;TALDO1;CUL4A;CCNB1;EIF5;HECTD3;CHPT1;GPBP1L1;HAGH;ACP1
Lymphoma_burkitts(Daudi)	3/139	0.8794943142771109	1	0.4943136814720193	-0.06347391996314378	IMPDH2;RPL14;EIF2S2
UterusCorpus	1/98	0.9237891859030031	1	0.8370561747399373	-0.06635460409922687	HDLBP
Adipocyte	3/181	0.9503922569079142	1	1.4115890825676218	-0.07182232669569899	LPCAT3;PPIH;AGPAT2
Leukemia_chronicMyelogenousK-562	3/124	0.8366930615102791	1	0.40544146166064715	-0.07228939702812427	AIMP2;TARS;GALK2
AdrenalCortex	2/106	0.9381534595676596	1	1.1441893149254287	-0.07304703721972532	RAB20;PIK3C2A
TrigeminalGanglion	4/196	0.8876313168541179	1	0.6757894806655579	-0.08055329915230272	KIAA1468;RMND1;FBXO4;LLPH
GlobusPallidus	1/59	0.7894216752913477	1	0.41080080089064225	-0.09713576296229634	AIM1L
Adrenalgland	1/65	0.8198685416654653	1	0.5223746253932604	-0.10374948599834573	BRE
FetalThyroid	3/66	0.8244977803475305	1	0.5957271508222354	-0.114963919486354	CNKSR1;RPL37A;RPL38
DorsalRootGanglion	1/69	0.8376857214744029	1	0.8108656916498282	-0.14361427375960342	ZBED4
OlfactoryBulb	2/83	0.887296864023015	1	1.21077709837218	-0.1447794820789547	TSPAN15;SSFA2
Mouse Gene Atlas
Term	Overlap	P-value	Adjusted P-value	Z-score	Combined Score	Genes
intestine_small	66/466	0.000000000000000000592278044552	0.000000000000000053305024009717	-1.5952103350855906	59.77333059652355	TMEM45B;MTCH2;PGAP3;MOGAT2;TRADD;DQX1;HNF4G;CIB1;PEPD;PCSK5;CCDC28A;CASP7;TFG;AIM1L;HNF4A;MLX;UPP1;PLS1;OSR2;TMEM150B;AMN;PLA2G12B;ARHGEF16;ACSL5;LSR;TM4SF5;TMC5;ACE2;TMIGD1;SLC7A7;RBP2;ILVBL;HKDC1;CHMP4C;DPEP1;CDH17;CFTR;RBM47;MVP;AK2;USH1C;GATA5;GMDS;HECTD3;MARVELD3;ERBB2;ZBTB7B;FZD5;SLC10A2;NR1H4;CIDEB;CORO2A;TM9SF2;TSPAN15;GALE;DNMBP;XPNPEP1;FABP6;XPNPEP2;LPCAT3;GIPC2;GALM;DEGS2;LPIN3;FRK;TJP3
intestine_large	50/374	0.0000000000000522642678472537	0.0000000000023518920531264163	-1.5778364427862002	42.247834575334046	TMEM45B;AHCYL2;ITGB4;TRADD;HEPACAM2;CIB1;PCSK7;C1GALT1C1;SLC39A9;HNF4A;RASSF6;MLX;GNPNAT1;ARHGEF16;SLC35C1;TMC5;SDCBP2;ELF3;ETHE1;CHMP4C;CMPK1;DPEP1;CDH17;B4GALT4;CFTR;LLGL2;PDXDC1;USH1C;IQGAP2;TM9SF4;PDLIM1;GMDS;HECTD3;MARVELD3;ERBB2;RHBDL2;GALNT7;SLC35A1;TMEM30B;TNK1;TM9SF2;PYY;GALE;DNMBP;GIPC2;OCIAD2;DEGS2;FRK;TJP3;FOXA3
kidney	24/554	0.020955933855335628	0.6286780156600689	-1.432310123315383	0.6647867660732323	OSBPL9;KCNK5;RBM47;AMN;COX15;NR1H4;DNAJC22;CIDEB;SLC3A1;PEPD;SIGIRR;PEX7;TMIGD1;SLC7A7;MEP1A;SLC22A18;EHHADH;HNF4A;SUCLG2;CHPT1;GALM;TMBIM6;ITGB6;SGK2
B-cells_GL7negative_Alum	16/379	0.061661721462887835	0.9999999999801593	-1.8800134884629474	0.000000000037300754764164377	CCT3;CDV3;BTG1;TXNDC9;STX8;MRPS31;ZDHHC6;WDR61;ZC3HAV1;COX7C;EIF5;BRE;SLC39A9;MARVELD3;MAPK6;CCDC94
B-cells_marginal_zone	11/380	0.5792650254795952	0.9999999999801593	-1.6850212782323963	0.00000000003343197581158426	TSSC1;CCNI;DHRS7B;RMND1;CEBPG;ZDHHC6;CIB1;YBX1;PSEN1;EARS2;SUV420H1
cornea	12/427	0.1176940301560229	0.9999999999801593	-1.6744317226983203	0.00000000003322187177963872	TM9SF2;PARD6B;SPHK2;ESRP2;PARD3;PWWP2B;AIM1L;RIPK4;CHMP4C;MPZL3;DPP3;TXNDC17
mega_erythrocyte_progenitor	18/562	0.376938728112912	0.9999999999801593	-1.4792353240689717	0.000000000029349041589428674	CCT3;EIF2B4;RPL31;HMGB2;ZDHHC6;WDR61;MRPL15;SDSL;MRPL35;ARFGAP2;CUL4A;PDE12;RPL14;EIF3G;PPIF;LLPH;ACP1;RBKS
adipose_brown	14/456	0.16226495889480297	0.9999999999801593	-1.4558958015600816	0.00000000002888596948342556	MTCH2;PTGES2;RMND1;TALDO1;ETFA;ADIPOR2;AGPAT2;GANC;MFSD8;PTP4A1;AIFM2;DHRS7B;CHPT1;SUCLG1
prostate	13/329	0.2887930748659974	0.9999999999801593	-1.398893492448555	0.000000000027755004643966612	SLC30A7;CHID1;CASZ1;TMEM30B;CHKA;PWWP2B;PAWR;TESK2;SND1;DDOST;PDLIM1;ZFYVE27;FAM3A
macrophage_peri_LPS_thio_7hrs	19/707	0.5786513654261277	0.9999999999801593	-1.3395207232390827	0.00000000002657700825322662	MTMR14;USP12;KEAP1;PAWR;ZC3HAV1;NMI;IFI35;TAPBPL;PSMB10;IFIH1;SGPL1;CASP7;RAB20;TNIP1;SCO1;IRF1;ZC3H12A;AZI2;MAPK6
macrophage_bone_marrow_24h_LPS	14/551	0.5950609844046091	0.9999999999801593	-1.3341094998692318	0.000000000026469645876769446	GHDC;CASZ1;SPHK2;STX8;DERL1;ALG12;RSRC2;GLRX;TM9SF4;OCEL1;MLX;ZBTB7B;THOP1;CCDC93
B-cells_GL7_negative_KLH	8/212	0.37570015225896847	0.9999999999801593	-1.3326697995517713	0.00000000002644108123677881	CCT3;QARS;BRE;STX8;MAPK6;COX7C;CCDC94;SUV420H1
nih_3T3	10/252	0.34540775536962937	0.9999999999801593	-1.2485622894666455	0.000000000024772330652401507	POFUT1;CTDSP2;RPL37A;TCEA1;TRPM7;TRMT2A;PDSS1;MRPL15;YBX1;RPS24
lacrimal_gland	24/749	0.6599216118554205	0.9999999999801593	-1.236097981061722	0.00000000002452503023994698	TBC1D8B;SLC30A7;ACVR1;PI4K2B;UPF1;MON2;CASZ1;RBM47;XBP1;HEXB;PWWP2B;HDLBP;EIF2S2;SND1;EIF3M;QARS;SLC39A9;HECTD3;HKDC1;SLC17A5;STT3A;GALM;TMBIM6;CDK5RAP3
dendritic_plasmacytoid_B220+	6/214	0.38305165146921893	0.9999999999801593	-1.166701888398761	0.000000000023148164249411636	LIN54;RPS6KA1;ERLIN1;FBRSL1;TRMT2A;CDC14B
stomach	14/249	0.19891607321699115	0.9999999999801593	-1.15620495829312	0.000000000022939897969382336	AHCYL2;MGST3;SLC35C1;SLC39A11;SDCBP2;TSPAN15;UGDH;ELF3;ETHE1;GIPC2;LNX1;OCIAD2;DEGS2;ZBTB7B
macrophage_bone_marrow_2hr_LPS	7/365	0.6881343301078391	0.9999999999801593	-1.0689405053434027	0.000000000021208511477167538	PDLIM1;OSR2;PDE12;MTMR14;NFKBIZ;ZC3H12A;CCDC93
liver	26/928	0.3948434225355688	0.9999999999801593	-1.0093016814712983	0.000000000020025236379766342	DDC;SHMT1;DNAJC22;ADIPOR2;PRRC1;HNF4A;GNPNAT1;IKBKG;OSR2;PLA2G12B;LRBA;NR1H4;CIDEB;LSR;A1CF;TTC38;SEPSECS;PEX7;MAVS;EHHADH;SUCLG2;GALM;HAGH;SGK2;FOXA3;RBKS
macrophage_bone_marrow_6hr_LPS	21/730	0.7258593067110809	0.9999999999801593	-0.9752041243929055	0.000000000019348717502405483	CCT3;SLC30A6;CYFIP1;SPHK2;MGST3;MTMR14;LRBA;KEAP1;IFI35;FNBP1L;RAB20;RPS16;TNIP1;POFUT1;ELF4;PPP6R3;ZC3H12A;PDSS2;IKBKG;AZI2;ACP1
C3H_10T1_2	5/155	0.34087924609517706	0.9999999999801593	-0.971116012351915	0.000000000019267606560582356	GPR39;PDXDC1;CTDSP2;PPP6R3;WWP2
mast_cells_IgE	14/598	0.6941271534137967	0.9999999999801593	-0.9470769779680434	0.000000000018790655660058118	SCYL3;LEPROT;WTAP;GPATCH2;MOSPD2;ARHGAP18;ZC3HAV1;EIF2S2;CCDC28A;MFSD8;PRRC1;SLTM;FADD;STT3B
RAW_264_7	6/222	0.6060590939725458	0.9999999999801593	-0.9322082685075683	0.00000000001849565028448593	GALNT7;CYFIP1;PDXDC1;PPP2R3C;TBC1D23;SMPDL3B
T-cells_CD8+	5/166	0.6092762260803439	0.9999999999801593	-0.6909026535105519	0.000000000013707981672821622	NSA2;C1GALT1C1;SPTLC1;MRPL15;TAPBPL
T-cells_CD4+	4/191	0.7007004415800866	0.9999999999801593	-0.6059770862280623	0.000000000012023000273564966	NSA2;TMED2;LSR;MAF1
dendritic_cells_myeloid_CD8a-	5/188	0.6906505884791911	0.9999999999801593	-0.5433077927647424	0.000000000010779598584660105	SCYL3;PPP2R3C;SLC39A9;FBRSL1;IRAK4
embryonic_stem_line_Bruce4_p13	20/876	0.8452628747444235	0.9999999999801593	-0.423547619489641	0.00000000000840347475296323	FZD5;SHMT1;MRPS31;DPY30;ZBTB8OS;CDC5L;PHB;MRPL15;EIF2S2;GTF2H3;NUBP1;ANAPC10;CCNB1;KARS;IMPDH2;FBRSL1;TBC1D14;PPIH;UPP1;EARS2
osteoclasts	2/110	0.6176945739333372	0.9999999999801593	-0.4131891655755482	0.000000000008197955935382102	ABCD4;HEXB
salivary_gland	13/480	0.8901724500268958	0.9999999999801593	-0.3629284677505893	0.0000000000072007492794993726	GALNT7;COPB2;MON2;XBP1;PDXDC1;CBX3;HDLBP;ZBTB8OS;IQGAP2;PDLIM1;ERBB2IP;SLC17A5;LNX1
adrenal_gland	4/245	0.8414422939143152	0.9999999999801593	-0.32628610607942127	0.000000000006473739736714918	ACVR1;AIFM2;DHCR7;PCSK5
dendritic_cells_lymphoid_CD8a+	6/142	0.7497934292889459	0.9999999999801593	-0.28085700241674394	0.000000000005572395216967486	LRBA;STAT3;ERLIN1;HPS5;CDK13;TXNDC17
retinal_pigment_epithelium	8/473	0.882186711762289	0.9999999999801593	-0.1814106863485598	0.0000000000035993122201579008	PARD6B;TBC1D2;PDE12;SEMA3B;OCIAD2;ATP5G1;GANC;ANAPC10
iris	3/133	0.7172090933723035	0.9999999999801593	-0.16422659254369157	0.0000000000032583680339628138	TMEM59;SEMA3B;OCIAD2
mast_cells	10/515	0.8541389382959539	0.9999999999801593	-0.1618068812683117	0.0000000000032103593056016038	SCYL3;MAN2B2;ELF4;P2RY1;ARHGAP18;FAM32A;RFXANK;SDSL;CORO2A;NFE2L2
B-cells_GL7_positive_Alum	4/142	0.7497934292889459	0.9999999999801593	-0.1443913414453182	0.000000000002864823071947171	BRE;WDR61;MAPK6;CCDC94
osteoblast_day5	3/175	0.8430126971539399	0.9999999999801593	-0.11543293032677078	0.0000000000022902683689509126	ACVR1;SSR4;ID3
Baf3	11/440	0.9182144740667973	0.9999999999801593	-0.10969694290590952	0.0000000000021764624513716702	PRRC1;RPN1;ALG5;CEBPG;RPL14;ZDHHC6;RPL37;CDK13;SND1;OCEL1;FAM118B
macrophage_peri_LPS_thio_1hrs	9/598	0.9346078707401755	0.9999999999801593	-0.06913566638951447	0.0000000000013716989549690594	ACVR1;GALNT6;CYFIP1;RAB20;VTA1;IRF1;MARVELD3;NFKBIZ;NFE2L2
common_myeloid_progenitor	1/80	0.7810476223532969	0.9999999999801593	-0.01698621598135575	0.00000000000033701815469935544	DHRS7B
3T3-L1	3/181	0.8561319576029118	0.9999999999801593	0.031183619328411086	-0.000000000000618704357370914	ABCD4;MTCH2;TRPM7
placenta	8/411	0.8875353883103191	0.9999999999801593	0.13045393372640612	-0.0000000000025882953605442336	PDLIM1;PARD6B;RPN2;PRKCSH;PARD3;RASSF6;ZFYVE21;WDR61
mIMCD-3	8/300	0.9221249534949182	0.9999999999801593	0.2098410837840824	-0.000000000004163390770177866	GPR39;CBX3;PUS1;RABL3;TRMT2A;ACP1;SUV420H1;GET4
epidermis	6/373	0.9216091622048863	0.9999999999801593	0.28769352379157137	-0.000000000005708036481675057	CASZ1;POF1B;ITGB4;PERP;TNK1;SSFA2
MEF	4/300	0.9221249534949182	0.9999999999801593	0.3265182895483513	-0.000000000006478346415703127	TXNRD1;TRADD;HDLBP;PIK3C2A
granulo_mono_progenitor	1/124	0.904310570252	0.9999999999801593	0.3702552600190663	-0.000000000007346117854401393	STT3A
heart	9/568	0.9572332489963025	0.9999999999801593	0.45132055966327417	-0.000000000008954508900778557	TMEM59;CASZ1;DDC;PPIF;ATP5C1;PDSS2;ETFA;MAF1;ATP5G1
granulocytes_mac1+gr1+	9/557	0.9799181661156855	0.9999999999801593	0.5183013783388797	-0.000000000010283454201785083	TMEM59;ZFYVE27;PRRC1;QARS;SLC39A9;DAPK3;TMED2;IRAK4;ARFGAP2
macrophage_peri_LPS_thio_0hrs	5/353	0.9625026011017193	0.9999999999801593	0.5528743720754526	-0.000000000010969406067952407	GALNT6;SGPL1;NAGK;RPS6;FADD
mammary_gland__lact	1/104	0.8605662501060185	0.9999999999801593	0.5731288690555781	-0.000000000011371269155299112	FAM160A2
mast_cells_IgE+antigen_6hr	2/146	0.9367858814487516	0.9999999999801593	0.5962674582445842	-0.000000000011830354606666537	P2RY1;DERL1
thymocyte_SP_CD4+	2/203	0.9784540824908811	0.9999999999801593	0.6508670010861393	-0.000000000012913646918272987	PPP6R3;MAPK6
uterus	3/141	0.9305371616352313	0.9999999999801593	0.6528445589368664	-0.000000000012952883019968316	OSR2;STX18;SEC23B
pituitary	5/294	0.9748453966712937	0.9999999999801593	0.7034267948977195	-0.000000000013956469212608583	TBC1D8B;COPA;PRRC1;FAM3A;EARS2
macrophage_bone_marrow_0hr	1/180	0.9667224623425306	0.9999999999801593	0.7123355374681086	-0.00000000001413322476458435	RNF141
min6	4/361	0.9665274289138176	0.9999999999801593	0.7294479199831634	-0.000000000014472746149692334	SEPSECS;HEPACAM2;STT3A;OCIAD2
ciliary_bodies	3/317	0.9826645674650077	0.9999999999801593	0.7500975040540876	-0.000000000014882448035417246	LRBA;PPIH;OCIAD2
hippocampus	1/176	0.9641110656972391	0.9999999999801593	0.7987583925258966	-0.000000000015847913378422457	MON2
pancreas	11/667	0.9867944602863338	0.9999999999801593	0.8005252860096614	-0.00000000001588296975484569	CHID1;RBM47;XBP1;HKDC1;TNK1;ALG5;DAPK3;MAGT1;PSEN1;FOXA3;SSFA2
B-cells_GL7_positive_KLH	3/207	0.9800239514158584	0.9999999999801593	0.8434470677834471	-0.000000000016734567291677144	SLC39A9;COX7C;SUV420H1
thymocyte_DP_CD4+CD8+	4/410	0.9835645565690928	0.9999999999801593	0.8776362967142476	-0.000000000017412905001352997	ILVBL;CBX3;MRPS31;LRRC1
osteoblast_day14	3/301	0.9775289966593422	0.9999999999801593	0.9084489224565746	-0.000000000018024248591974884	FAM114A1;HDLBP;ID3
ovary	1/153	0.944603483572144	0.9999999999801593	0.9343231127584091	-0.00000000001853761024235278	IDH1
follicular_B-cells	8/603	0.988929276936392	0.9999999999801593	1.0891462818170925	-0.00000000002160940791631002	IKBKB;SPTLC1;ELF4;PPCS;FBXO4;TRMT2A;CDK13;SUV420H1
neuro2a	5/425	0.9868457083221843	0.9999999999801593	1.131210356752361	-0.000000000022443987962235473	RPS25;LSM1;PDSS1;EIF3D;GET4
NK_cells	10/669	0.9954505829130954	0.9999999999801593	1.1333547678772184	-0.000000000022486534547125805	CCT3;MFSD8;GALNT6;SCYL3;WTAP;CBX3;ARIH2;GPATCH2;ZC3HAV1;AZI2
mast_cells_IgE+antigen_1hr	3/265	0.9933421012111177	0.9999999999801593	1.1698741780549542	-0.000000000023211104648101704	PARP4;RPS3;ARHGAP18
embryonic_stem_line_V26_2_p16	12/728	0.9939058431197928	0.9999999999801593	1.1928981490522699	-0.000000000023667915996072533	HN1L;CCNB1;SHMT1;IMPDH2;RPL37A;CDC5L;DPY30;PPIH;MRPL15;GTF2H3;ACP1;DERA
cerebral_cortex_prefrontal	2/344	0.988863841034265	0.9999999999801593	1.2589362087786429	-0.00000000002497815631406546	CCNI;SND1
bladder	3/195	0.9749357144065125	0.9999999999801593	1.2788206780537448	-0.00000000002537267779840467	CAST;RIPK4;PAWR
eyecup	15/828	0.9983965278255615	0.9999999999801593	1.3218535048409517	-0.000000000026226478544329477	OSBPL9;COPA;TSSC1;DQX1;STAT3;SEMA3B;DAPK3;TM9SF2;IKBKB;ULK3;PDSS2;PPIH;TRPM7;THOP1;RBM10
lens	10/947	0.9972486038658599	0.9999999999801593	1.3307658878927902	-0.00000000002640330632594966	CASZ1;AKIRIN1;SPTLC1;DNMBP;GDI2;GPR160;RPS3;PSEN1;DDOST;ARFGAP2
osteoblast_day21	4/264	0.9932145834161897	0.9999999999801593	1.4229399356813592	-0.000000000028232102541126148	FAM114A1;ID3;PCSK5;RNFT1
amygdala	2/308	0.9970580225290672	0.9999999999801593	1.515959297824239	-0.000000000030077670371837454	MON2;TSSC1
hypothalamus	1/296	0.9963042305596026	0.9999999999801593	1.5454466157717577	-0.000000000030662718948437076	RPS15A
retina	6/664	0.9986045685713628	0.9999999999801593	1.5686906816971706	-0.00000000003112389713046956	ZFYVE27;RPS15A;TFG;PDE12;HOOK1;GNPNAT1
bone_marrow	4/413	0.996487322538464	0.9999999999801593	1.6368785708893563	-0.000000000032476791536947036	EIF5;HMGB2;ACP1;ENGASE
dorsal_root_ganglia	4/541	0.9977946840156868	0.9999999999801593	1.7547647152075392	-0.000000000034815733351082905	ZFYVE27;SEMA3B;CMPK1;CCDC28A
dorsal_striatum	2/477	0.9998833642602022	0.9999999999801593	1.7706370356655516	-0.00000000003513065105596948	CCNI;MRPL35
T-cells_foxP3+	1/112	0.9999999997640303	0.9999999999801593	1.7931253077053295	-0.00000000003557683376985595	PSEN1
cerebellum	2/428	0.9997017679425019	0.9999999999801593	1.8386974459541114	-0.00000000003648101619372047	MTCH2;FBRSL1
stem_cells__HSC	1/186	0.999999999821494	0.9999999999801593	1.848189274147994	-0.00000000003666934056367648	TMEM59
nucleus_accumbens	1/383	0.9992951946806046	0.9999999999801593	1.8630587223063348	-0.00000000003696436059552008	SND1
testis	37/3059	0.9999857956866669	0.9999999999801593	1.885131608617701	-0.00000000003740230177216062	GRAMD1C;PI4K2B;MTCH2;PWWP2B;RMND1;USP12;NGLY1;CEBPG;TAF9;GPATCH2;FBXO46;PPP2R3C;ARIH2;TBC1D14;LRRFIP2;TXNL4A;MAPK6;CCDC93;TPRN;CAST;CDV3;NOSIP;ALG12;WWP2;OCEL1;FAM118B;EIF5;HOOK2;SLTM;HGS;GPR160;TBC1D23;STT3B;PIGF;RNF141;THOP1;OTUD3
skeletal_muscle	6/710	0.9993079845368257	0.9999999999801593	1.889645263839244	-0.00000000003749185578203446	AIMP2;CNKSR1;PDSS2;LRRFIP2;GANC;ARFGAP2
microglia	3/90	0.9999999998592904	0.9999999999801593	2.0344820092554	-0.00000000004036551597370931	HEXB;GLRX;PIK3C2A
C2C12	1/167	0.9999999998378782	0.9999999999801593	2.317765117193699	-0.000000000045986046785259945	PRKAA1
bone	1/157	0.9999999997933935	0.9999999999801593	2.3634011239464696	-0.00000000004689149640397123	HMGB2
cerebral_cortex	1/349	0.9999999999502704	0.9999999999801593	2.422698400726022	-0.000000000048067994973215654	FAM160A2
olfactory_bulb	1/414	0.9999999999801593	0.9999999999801593	2.4282788479746915	-0.00000000004817871486728788	ACVR1
adipose_white	1/199	0.9999999998307881	0.9999999999801593	2.5789616517451455	-0.00000000005116836485922153	LMAN2
lung	1/354	0.9999999999389588	0.9999999999801593	2.610440414820409	-0.000000000051792925070600445	B4GALT4
